# Supplementary material for: Prevalence of Electronic Cigarette Use and Its Determinants among 13-to-15-Year-Old Students in Greece: Results from the 2013 Global Youth Tobacco Survey (GYTS)
Source: MDPI journal article supplement (doi:10.3390/ijerph17051671), 2020-03-04
Supplement: s1 [file s1]

Frequencies

|   |         | Statistics |        |              |                    |                    |                  |                 |                |                 |                  |                |                   |                 |
|---|---------|------------|--------|--------------|--------------------|--------------------|------------------|-----------------|----------------|-----------------|------------------|----------------|-------------------|-----------------|
|   |         | Age        | Gender | Pocket money | Father's education | Mother's education | Ever tobacco use | Tobacco smoking | Ever e-cig use | E-cigarette use | Family e-cig use | Family smoking | Smoking intention | Ever shisha use |
| N | Valid   | 4096       | 4095   | 4084         | 3749               | 3837               | 4034             | 3991            | 4066           | 4057            | 4058             | 4096           | 4057              | 4030            |
|   | Missing | 0          | 1      | 12           | 347                | 259                | 62               | 105             | 30             | 39              | 38               | 0              | 39                | 66              |

Frequency Table

|       |              | Age       |         |               |                    |
|-------|--------------|-----------|---------|---------------|--------------------|
|       |              | Frequency | Percent | Valid Percent | Cumulative Percent |
| Valid | 13 years old | 1542      | 37,7    | 37,7          | 37,7               |
|       | 14 years old | 1432      | 35,0    | 35,0          | 72,6               |
|       | 15 years old | 1122      | 27,4    | 27,4          | 100,0              |
|       | Total        | 4096      | 100,0   | 100,0         |                    |

|         |        | Gender    |         |               |                    |
|---------|--------|-----------|---------|---------------|--------------------|
|         |        | Frequency | Percent | Valid Percent | Cumulative Percent |
| Valid   | Male   | 2108      | 51,5    | 51,5          | 51,5               |
|         | Female | 1987      | 48,5    | 48,5          | 100,0              |
|         | Total  | 4095      | 100,0   | 100,0         |                    |
| Missing | System | 1         | ,0      |               |                    |
| Total   |        | 4096      | 100,0   |               |                    |

|       |          | Pocket money |         |               |                    |
|-------|----------|--------------|---------|---------------|--------------------|
|       |          | Frequency    | Percent | Valid Percent | Cumulative Percent |
| Valid | No money | 241          | 5,9     | 5,9           | 5,9                |
|       | 1-9€     | 2245         | 54,8    | 55,0          | 60,9               |
|       | 10-19€   | 1162         | 28,4    | 28,5          | 89,3               |

|         |        |      |       |       |       |
|---------|--------|------|-------|-------|-------|
|         | >20€   | 436  | 10,7  | 10,7  | 100,0 |
|         | Total  | 4084 | 99,7  | 100,0 |       |
| Missing | System | 12   | ,3    |       |       |
| Total   |        | 4096 | 100,0 |       |       |

Father's education

|         |                        | Frequency | Percent | Valid Percent | Cumulative Percent |
|---------|------------------------|-----------|---------|---------------|--------------------|
| Valid   | High school or above   | 2707      | 66,1    | 72,2          | 72,2               |
|         | Middle school or below | 1042      | 25,5    | 27,8          | 100,0              |
|         | Total                  | 3749      | 91,5    | 100,0         |                    |
| Missing | System                 | 347       | 8,5     |               |                    |
| Total   |                        | 4096      | 100,0   |               |                    |

Mother's education

|         |                        | Frequency | Percent | Valid Percent | Cumulative Percent |
|---------|------------------------|-----------|---------|---------------|--------------------|
| Valid   | High school or above   | 2997      | 73,2    | 78,1          | 78,1               |
|         | Middle school or below | 840       | 20,5    | 21,9          | 100,0              |
|         | Total                  | 3837      | 93,7    | 100,0         |                    |
| Missing | System                 | 259       | 6,3     |               |                    |
| Total   |                        | 4096      | 100,0   |               |                    |

Ever tobacco use

|         |        | Frequency | Percent | Valid Percent | Cumulative Percent |
|---------|--------|-----------|---------|---------------|--------------------|
| Valid   | Yes    | 1228      | 30,0    | 30,4          | 30,4               |
|         | No     | 2806      | 68,5    | 69,6          | 100,0              |
|         | Total  | 4034      | 98,5    | 100,0         |                    |
| Missing | System | 62        | 1,5     |               |                    |
| Total   |        | 4096      | 100,0   |               |                    |

Tobacco smoking

|       |     | Frequency | Percent | Valid Percent | Cumulative Percent |
|-------|-----|-----------|---------|---------------|--------------------|
| Valid | Yes | 402       | 9,8     | 10,1          | 10,1               |
|       | No  | 3588      | 87,6    | 89,9          | 100,0              |

|         |        |      |       |       |  |
|---------|--------|------|-------|-------|--|
|         | Total  | 3991 | 97,4  | 100,0 |  |
| Missing | System | 105  | 2,6   |       |  |
| Total   |        | 4096 | 100,0 |       |  |

Ever e-cig use

|         |        | Frequency | Percent | Valid Percent | Cumulative Percent |
|---------|--------|-----------|---------|---------------|--------------------|
| Valid   | Yes    | 498       | 12,2    | 12,3          | 12,3               |
|         | No     | 3568      | 87,1    | 87,7          | 100,0              |
|         | Total  | 4066      | 99,3    | 100,0         |                    |
| Missing | System | 30        | ,7      |               |                    |
| Total   |        | 4096      | 100,0   |               |                    |

E-cigarette use

|         |        | Frequency | Percent | Valid Percent | Cumulative Percent |
|---------|--------|-----------|---------|---------------|--------------------|
| Valid   | Yes    | 115       | 2,8     | 2,8           | 2,8                |
|         | No     | 3942      | 96,2    | 97,2          | 100,0              |
|         | Total  | 4057      | 99,0    | 100,0         |                    |
| Missing | System | 39        | 1,0     |               |                    |
| Total   |        | 4096      | 100,0   |               |                    |

Family e-cig use

|         |        | Frequency | Percent | Valid Percent | Cumulative Percent |
|---------|--------|-----------|---------|---------------|--------------------|
| Valid   | Yes    | 498       | 12,2    | 12,3          | 12,3               |
|         | No     | 3560      | 86,9    | 87,7          | 100,0              |
|         | Total  | 4058      | 99,1    | 100,0         |                    |
| Missing | System | 38        | ,9      |               |                    |
| Total   |        | 4096      | 100,0   |               |                    |

Family smoking

|       |         | Frequency | Percent | Valid Percent | Cumulative Percent |
|-------|---------|-----------|---------|---------------|--------------------|
| Valid | Someone | 4077      | 99,5    | 99,5          | 99,5               |
|       | No one  | 19        | ,5      | ,5            | 100,0              |
|       | Total   | 4096      | 100,0   | 100,0         |                    |

Frequency Table

| Susceptibility to smoking? |        |           |         |               |                    |
|----------------------------|--------|-----------|---------|---------------|--------------------|
|                            |        | Frequency | Percent | Valid Percent | Cumulative Percent |
| Valid                      | 1      | 323       | 12,8    | 12,9          | 12,9               |
|                            | 2      | 2187      | 86,5    | 87,1          | 100,0              |
|                            | Total  | 2510      | 99,3    | 100,0         |                    |
| Missing                    | System | 17        | ,7      |               |                    |
| Total                      |        | 2527      | 100,0   |               |                    |

T-Test

| One-Sample Statistics      |      |      |                |                 |
|----------------------------|------|------|----------------|-----------------|
|                            | N    | Mean | Std. Deviation | Std. Error Mean |
| Gender                     | 4095 | 1,49 | ,500           | ,008            |
| Father's education         | 3749 | 1,28 | ,448           | ,007            |
| Mother's education         | 3837 | 1,22 | ,414           | ,007            |
| Ever tobacco use           | 4034 | 1,70 | ,460           | ,007            |
| Tobacco smoking            | 3991 | 1,90 | ,301           | ,005            |
| Ever e-cig use             | 4066 | 1,88 | ,328           | ,005            |
| E-cigarette use            | 4057 | 1,97 | ,166           | ,003            |
| Family e-cig use           | 4058 | 1,88 | ,328           | ,005            |
| Family smoking             | 4096 | 1,00 | ,068           | ,001            |
| Susceptibility to smoking? | 4058 | 1,70 | ,460           | ,007            |
| Ever shisha use            | 4030 | 1,84 | ,370           | ,006            |

One-Sample Test

Test Value = 1

|                            | t       | df   | Sig. (2-tailed) | Mean Difference | 95% Confidence Interval of the Difference |       |
|----------------------------|---------|------|-----------------|-----------------|-------------------------------------------|-------|
|                            |         |      |                 |                 | Lower                                     | Upper |
| Gender                     | 62,111  | 4094 | ,000            | ,485            | ,47                                       | ,50   |
| Father's education         | 37,994  | 3748 | ,000            | ,278            | ,26                                       | ,29   |
| Mother's education         | 32,781  | 3836 | ,000            | ,219            | ,21                                       | ,23   |
| Ever tobacco use           | 95,999  | 4033 | ,000            | ,696            | ,68                                       | ,71   |
| Tobacco smoking            | 188,611 | 3990 | ,000            | ,899            | ,89                                       | ,91   |
| Ever e-cig use             | 170,629 | 4065 | ,000            | ,877            | ,87                                       | ,89   |
| E-cigarette use            | 373,170 | 4056 | ,000            | ,972            | ,97                                       | ,98   |
| Family e-cig use           | 170,267 | 4057 | ,000            | ,877            | ,87                                       | ,89   |
| Family smoking             | 4,389   | 4095 | ,000            | ,005            | ,00                                       | ,01   |
| Susceptibility to smoking? | 96,321  | 4057 | ,000            | ,696            | ,68                                       | ,71   |
| Ever shisha use            | 143,417 | 4029 | ,000            | ,836            | ,82                                       | ,85   |

T-Test

| One-Sample Statistics      |      |      |                |
|----------------------------|------|------|----------------|
|                            | N    | Mean | Std. Deviation |
| Susceptibility to smoking? | 2510 | 1,87 | ,335           |

|                            | Std. Error Mean |
|----------------------------|-----------------|
| Susceptibility to smoking? | ,007            |

| One-Sample Test            |         |      |                 |                 |                                           |
|----------------------------|---------|------|-----------------|-----------------|-------------------------------------------|
|                            |         |      |                 | Test Value = 1  |                                           |
|                            | t       | df   | Sig. (2-tailed) | Mean Difference | 95% Confidence Interval of the Difference |
|                            |         |      |                 |                 | LowerUpper                                |
| Susceptibility to smoking? | 130,325 | 2509 | ,000            | ,871            | ,86,88                                    |

Frequencies

|   |         | Statistics       |                 |                                   |                              |                              |                            |                |                 |                                |                                        |                                   |                                           |
|---|---------|------------------|-----------------|-----------------------------------|------------------------------|------------------------------|----------------------------|----------------|-----------------|--------------------------------|----------------------------------------|-----------------------------------|-------------------------------------------|
|   |         | Ever tobacco use | Tobacco smoking | Ever other smoked tobacco product | Other smoked tobacco product | Ever other non-smoke tobacco | Non-smoked tobacco product | Ever e-cig use | E-cigarette use | Any combustible product (Ever) | Any nicotine-containing product (Ever) | Any combustible product (Current) | Any nicotine-containing product (Current) |
| N | Valid   | 4034             | 3991            | 3960                              | 3951                         | 4045                         | 4048                       | 4066           | 4057            | 3974                           | 3976                                   | 3900                              | 3883                                      |
|   | Missing | 62               | 105             | 136                               | 145                          | 51                           | 48                         | 30             | 39              | 122                            | 120                                    | 196                               | 213                                       |

Frequency Table

| Ever tobacco use |        |           |         |               |                    |
|------------------|--------|-----------|---------|---------------|--------------------|
|                  |        | Frequency | Percent | Valid Percent | Cumulative Percent |
| Valid            | Yes    | 1228      | 30,0    | 30,4          | 30,4               |
|                  | No     | 2806      | 68,5    | 69,6          | 100,0              |
|                  | Total  | 4034      | 98,5    | 100,0         |                    |
| Missing          | System | 62        | 1,5     |               |                    |
| Total            |        | 4096      | 100,0   |               |                    |

| Tobacco smoking |        |           |         |               |                    |
|-----------------|--------|-----------|---------|---------------|--------------------|
|                 |        | Frequency | Percent | Valid Percent | Cumulative Percent |
| Valid           | Yes    | 402       | 9,8     | 10,1          | 10,1               |
|                 | No     | 3588      | 87,6    | 89,9          | 100,0              |
|                 | Total  | 3991      | 97,4    | 100,0         |                    |
| Missing         | System | 105       | 2,6     |               |                    |
| Total           |        | 4096      | 100,0   |               |                    |

| Ever other smoked tobacco product |  |           |         |               |                    |
|-----------------------------------|--|-----------|---------|---------------|--------------------|
|                                   |  | Frequency | Percent | Valid Percent | Cumulative Percent |

|         |        |      |       |       |       |
|---------|--------|------|-------|-------|-------|
| Valid   | Yes    | 663  | 16,2  | 16,7  | 16,7  |
|         | No     | 3296 | 80,5  | 83,3  | 100,0 |
|         | Total  | 3960 | 96,7  | 100,0 |       |
| Missing | System | 136  | 3,3   |       |       |
| Total   |        | 4096 | 100,0 |       |       |

Other smoked tobacco product

|         |        | Frequency | Percent | Valid Percent | Cumulative Percent |
|---------|--------|-----------|---------|---------------|--------------------|
| Valid   | Yes    | 301       | 7,3     | 7,6           | 7,6                |
|         | No     | 3650      | 89,1    | 92,4          | 100,0              |
|         | Total  | 3951      | 96,5    | 100,0         |                    |
| Missing | System | 145       | 3,5     |               |                    |
| Total   |        | 4096      | 100,0   |               |                    |

Ever other non-smoke tobacco

|         |        | Frequency | Percent | Valid Percent | Cumulative Percent |
|---------|--------|-----------|---------|---------------|--------------------|
| Valid   | Yes    | 137       | 3,3     | 3,4           | 3,4                |
|         | No     | 3908      | 95,4    | 96,6          | 100,0              |
|         | Total  | 4045      | 98,8    | 100,0         |                    |
| Missing | System | 51        | 1,2     |               |                    |
| Total   |        | 4096      | 100,0   |               |                    |

Non-smoked tobacco product

|         |        | Frequency | Percent | Valid Percent | Cumulative Percent |
|---------|--------|-----------|---------|---------------|--------------------|
| Valid   | Yes    | 61        | 1,5     | 1,5           | 1,5                |
|         | No     | 3987      | 97,3    | 98,5          | 100,0              |
|         | Total  | 4048      | 98,8    | 100,0         |                    |
| Missing | System | 48        | 1,2     |               |                    |
| Total   |        | 4096      | 100,0   |               |                    |

Ever e-cig use

|       |     | Frequency | Percent | Valid Percent | Cumulative Percent |
|-------|-----|-----------|---------|---------------|--------------------|
| Valid | Yes | 498       | 12,2    | 12,3          | 12,3               |

|         |        |      |       |       |       |
|---------|--------|------|-------|-------|-------|
|         | No     | 3568 | 87,1  | 87,7  | 100,0 |
|         | Total  | 4066 | 99,3  | 100,0 |       |
| Missing | System | 30   | ,7    |       |       |
| Total   |        | 4096 | 100,0 |       |       |

E-cigarette use

|         |        | Frequency | Percent | Valid Percent | Cumulative Percent |
|---------|--------|-----------|---------|---------------|--------------------|
| Valid   | Yes    | 115       | 2,8     | 2,8           | 2,8                |
|         | No     | 3942      | 96,2    | 97,2          | 100,0              |
|         | Total  | 4057      | 99,0    | 100,0         |                    |
| Missing | System | 39        | 1,0     |               |                    |
| Total   |        | 4096      | 100,0   |               |                    |

Any combustible product (Ever)

|         |        | Frequency | Percent | Valid Percent | Cumulative Percent |
|---------|--------|-----------|---------|---------------|--------------------|
| Valid   | 1      | 1386      | 33,8    | 34,9          | 34,9               |
|         | 2      | 2588      | 63,2    | 65,1          | 100,0              |
|         | Total  | 3974      | 97,0    | 100,0         |                    |
| Missing | System | 122       | 3,0     |               |                    |
| Total   |        | 4096      | 100,0   |               |                    |

Any nicotine-containing product (Ever)

|         |        | Frequency | Percent | Valid Percent | Cumulative Percent |
|---------|--------|-----------|---------|---------------|--------------------|
| Valid   | 1      | 1511      | 36,9    | 38,0          | 38,0               |
|         | 2      | 2464      | 60,2    | 62,0          | 100,0              |
|         | Total  | 3976      | 97,1    | 100,0         |                    |
| Missing | System | 120       | 2,9     |               |                    |
| Total   |        | 4096      | 100,0   |               |                    |

Any combustible product (Current)

|       |     | Frequency | Percent | Valid Percent | Cumulative Percent |
|-------|-----|-----------|---------|---------------|--------------------|
| Valid | Yes | 518       | 12,6    | 13,3          | 13,3               |
|       | No  | 3382      | 82,6    | 86,7          | 100,0              |



|         |        |      |       |       |  |
|---------|--------|------|-------|-------|--|
|         | Total  | 3900 | 95,2  | 100,0 |  |
| Missing | System | 196  | 4,8   |       |  |
| Total   |        | 4096 | 100,0 |       |  |

Any nicotine-containing product (Current)

|         |        | Frequency | Percent | Valid Percent | Cumulative Percent |
|---------|--------|-----------|---------|---------------|--------------------|
| Valid   | Yes    | 592       | 14,4    | 15,2          | 15,2               |
|         | No     | 3291      | 80,3    | 84,8          | 100,0              |
|         | Total  | 3883      | 94,8    | 100,0         |                    |
| Missing | System | 213       | 5,2     |               |                    |
| Total   |        | 4096      | 100,0   |               |                    |

Crosstabs

Case Processing Summary

|                                                 |  | Valid             |         | Cases<br>Missing |         | Total |         |
|-------------------------------------------------|--|-------------------|---------|------------------|---------|-------|---------|
|                                                 |  | N                 | Percent | N                | Percent | N     | Percent |
| Age * Tobacco smoking                           |  | 3990              | 97,4%   | 106,000          | 2,6%    | 4096  | 100,0%  |
| Age * Other smoked tobacco product              |  | 3952 <sup>a</sup> | 96,5%   | 144,000          | 3,5%    | 4096  | 100,0%  |
| Age * Non-smoked tobacco product                |  | 4048 <sup>a</sup> | 98,8%   | 48,000           | 1,2%    | 4096  | 100,0%  |
| Age * E-cigarette use                           |  | 4057 <sup>a</sup> | 99,0%   | 39,000           | 1,0%    | 4096  | 100,0%  |
| Age * Any combustible product (Current)         |  | 3901 <sup>a</sup> | 95,2%   | 195,000          | 4,8%    | 4096  | 100,0%  |
| Age * Any nicotine-containing product (Current) |  | 3882 <sup>a</sup> | 94,8%   | 214,000          | 5,2%    | 4096  | 100,0%  |

a. Number of valid cases is different from the total count in the crosstabulation table because the cell counts have been rounded.

Age \* Tobacco smoking Crosstabulation

|     |              |       | Tobacco smoking |      | Total |
|-----|--------------|-------|-----------------|------|-------|
|     |              |       | Yes             | No   |       |
| Age | 13 years old | Count | 71              | 1437 | 1508  |

|       |              |              |       |       |        |
|-------|--------------|--------------|-------|-------|--------|
|       |              | % within Age | 4,7%  | 95,3% | 100,0% |
|       |              | Count        | 147   | 1247  | 1394   |
|       | 14 years old | % within Age | 10,5% | 89,5% | 100,0% |
|       |              | Count        | 184   | 904   | 1088   |
|       | 15 years old | % within Age | 16,9% | 83,1% | 100,0% |
|       |              | Count        | 402   | 3588  | 3990   |
| Total |              |              | 10,1% | 89,9% | 100,0% |

Age \* Other smoked tobacco product Crosstabulation

|       |              |              | Other smoked tobacco product |       | Total  |
|-------|--------------|--------------|------------------------------|-------|--------|
|       |              |              | Yes                          | No    |        |
| Age   | 13 years old | Count        | 41                           | 1443  | 1484   |
|       |              | % within Age | 2,8%                         | 97,2% | 100,0% |
|       | 14 years old | Count        | 119                          | 1263  | 1382   |
|       |              | % within Age | 8,6%                         | 91,4% | 100,0% |
|       | 15 years old | Count        | 141                          | 945   | 1086   |
|       |              | % within Age | 13,0%                        | 87,0% | 100,0% |
| Total |              |              | 301                          | 3651  | 3952   |
|       |              |              | 7,6%                         | 92,4% | 100,0% |

Age \* Non-smoked tobacco product Crosstabulation

|       |              |              | Non-smoked tobacco product |       | Total  |
|-------|--------------|--------------|----------------------------|-------|--------|
|       |              |              | Yes                        | No    |        |
| Age   | 13 years old | Count        | 15                         | 1502  | 1517   |
|       |              | % within Age | 1,0%                       | 99,0% | 100,0% |
|       | 14 years old | Count        | 23                         | 1395  | 1418   |
|       |              | % within Age | 1,6%                       | 98,4% | 100,0% |
|       | 15 years old | Count        | 23                         | 1090  | 1113   |
|       |              | % within Age | 2,1%                       | 97,9% | 100,0% |
| Total |              |              | 61                         | 3987  | 4048   |
|       |              |              | 1,5%                       | 98,5% | 100,0% |

Age \* E-cigarette use Crosstabulation

| E-cigarette use | Total |
|-----------------|-------|
|-----------------|-------|

|       |              |              | Yes  | No    |        |
|-------|--------------|--------------|------|-------|--------|
| Age   | 13 years old | Count        | 17   | 1502  | 1519   |
|       |              | % within Age | 1,1% | 98,9% | 100,0% |
|       | 14 years old | Count        | 46   | 1377  | 1423   |
|       |              | % within Age | 3,2% | 96,8% | 100,0% |
|       | 15 years old | Count        | 52   | 1063  | 1115   |
|       |              | % within Age | 4,7% | 95,3% | 100,0% |
| Total | Count        |              | 115  | 3942  | 4057   |
|       | % within Age |              | 2,8% | 97,2% | 100,0% |

Age \* Any combustible product (Current) Crosstabulation

|       |              |              | Any combustible product (Current) |       | Total  |
|-------|--------------|--------------|-----------------------------------|-------|--------|
|       |              |              | Yes                               | No    |        |
| Age   | 13 years old | Count        | 83                                | 1379  | 1462   |
|       |              | % within Age | 5,7%                              | 94,3% | 100,0% |
|       | 14 years old | Count        | 193                               | 1167  | 1360   |
|       |              | % within Age | 14,2%                             | 85,8% | 100,0% |
|       | 15 years old | Count        | 242                               | 837   | 1079   |
|       |              | % within Age | 22,4%                             | 77,6% | 100,0% |
| Total | Count        |              | 518                               | 3383  | 3901   |
|       | % within Age |              | 13,3%                             | 86,7% | 100,0% |

Age \* Any nicotine-containing product (Current) Crosstabulation

|       |              |              | Any nicotine-containing product<br>(Current) |       | Total  |
|-------|--------------|--------------|----------------------------------------------|-------|--------|
|       |              |              | Yes                                          | No    |        |
| Age   | 13 years old | Count        | 105                                          | 1335  | 1440   |
|       |              | % within Age | 7,3%                                         | 92,7% | 100,0% |
|       | 14 years old | Count        | 223                                          | 1143  | 1366   |
|       |              | % within Age | 16,3%                                        | 83,7% | 100,0% |
|       | 15 years old | Count        | 263                                          | 813   | 1076   |
|       |              | % within Age | 24,4%                                        | 75,6% | 100,0% |
| Total | Count        |              | 591                                          | 3291  | 3882   |
|       | % within Age |              | 15,2%                                        | 84,8% | 100,0% |

Crosstabs

| Case Processing Summary              |                   |         |               |         |       |         |
|--------------------------------------|-------------------|---------|---------------|---------|-------|---------|
|                                      | Valid             |         | Cases Missing |         | Total |         |
|                                      | N                 | Percent | N             | Percent | N     | Percent |
| Age * E-cigarette use                | 4057              | 99,0%   | 39,000        | 1,0%    | 4096  | 100,0%  |
| Gender * E-cigarette use             | 4056 <sup>a</sup> | 99,0%   | 40,000        | 1,0%    | 4096  | 100,0%  |
| Pocket money * E-cigarette use       | 4047 <sup>a</sup> | 98,8%   | 49,000        | 1,2%    | 4096  | 100,0%  |
| Father's education * E-cigarette use | 3715 <sup>a</sup> | 90,7%   | 381,000       | 9,3%    | 4096  | 100,0%  |
| Mother's education * E-cigarette use | 3803 <sup>a</sup> | 92,8%   | 293,000       | 7,2%    | 4096  | 100,0%  |
| Family e-cig use * E-cigarette use   | 4032 <sup>a</sup> | 98,4%   | 64,000        | 1,6%    | 4096  | 100,0%  |
| Family smoking * E-cigarette use     | 4055 <sup>a</sup> | 99,0%   | 41,000        | 1,0%    | 4096  | 100,0%  |
| Ever shisha use * E-cigarette use    | 3995 <sup>a</sup> | 97,5%   | 101,000       | 2,5%    | 4096  | 100,0%  |
| Tobacco smoking * E-cigarette use    | 3958 <sup>a</sup> | 96,6%   | 138,000       | 3,4%    | 4096  | 100,0%  |

a. Number of valid cases is different from the total count in the crosstabulation table because the cell counts have been rounded.

| Crosstab |              |              |                 |       |        |
|----------|--------------|--------------|-----------------|-------|--------|
|          |              |              | E-cigarette use |       | Total  |
|          |              |              | Yes             | No    |        |
| Age      | 13 years old | Count        | 17              | 1502  | 1519   |
|          |              | % within Age | 1,1%            | 98,9% | 100,0% |
|          | 14 years old | Count        | 46              | 1377  | 1423   |
|          |              | % within Age | 3,2%            | 96,8% | 100,0% |
|          | 15 years old | Count        | 52              | 1063  | 1115   |
|          |              | % within Age | 4,7%            | 95,3% | 100,0% |
| Total    |              | Count        | 115             | 3942  | 4057   |

|              |      |       |        |
|--------------|------|-------|--------|
| % within Age | 2,8% | 97,2% | 100,0% |
|--------------|------|-------|--------|

Chi-Square Tests

|                              | Value               | df | Asymptotic<br>Significance (2-<br>sided) |
|------------------------------|---------------------|----|------------------------------------------|
| Pearson Chi-Square           | 30,592 <sup>a</sup> | 2  | ,000                                     |
| Likelihood Ratio             | 33,139              | 2  | ,000                                     |
| Linear-by-Linear Association | 30,197              | 1  | ,000                                     |
| N of Valid Cases             | 4057                |    |                                          |

a. 0 cells (,0%) have expected count less than 5. The minimum expected count is 31,61.

Risk Estimate

|                                                  | Value        |
|--------------------------------------------------|--------------|
| Odds Ratio for Age (13 years old / 14 years old) | <sup>a</sup> |

a. Risk Estimate statistics cannot be computed. They are only computed for a 2\*2 table without empty cells.

Gender \* E-cigarette use

Crosstab

|        |                 |                 | E-cigarette use |       |        |
|--------|-----------------|-----------------|-----------------|-------|--------|
|        |                 |                 | Yes             | No    | Total  |
| Gender | Male            | Count           | 82              | 2004  | 2086   |
|        |                 | % within Gender | 3,9%            | 96,1% | 100,0% |
|        | Female          | Count           | 33              | 1937  | 1970   |
|        |                 | % within Gender | 1,7%            | 98,3% | 100,0% |
| Total  | Count           |                 | 115             | 3941  | 4056   |
|        | % within Gender |                 | 2,8%            | 97,2% | 100,0% |

| Chi-Square Tests                   |                     |    |                                          |                          |                          |
|------------------------------------|---------------------|----|------------------------------------------|--------------------------|--------------------------|
|                                    | Value               | df | Asymptotic<br>Significance (2-<br>sided) | Exact Sig. (2-<br>sided) | Exact Sig. (1-<br>sided) |
| Pearson Chi-Square                 | 18,715 <sup>a</sup> | 1  | ,000                                     |                          |                          |
| Continuity Correction <sup>b</sup> | 17,905              | 1  | ,000                                     |                          |                          |
| Likelihood Ratio                   | 19,382              | 1  | ,000                                     |                          |                          |
| Fisher's Exact Test                |                     |    |                                          | ,000                     | ,000                     |
| Linear-by-Linear Association       | 18,710              | 1  | ,000                                     |                          |                          |
| N of Valid Cases                   | 4056                |    |                                          |                          |                          |

a. 0 cells (,0%) have expected count less than 5. The minimum expected count is 55,86.

b. Computed only for a 2x2 table

| Risk Estimate                         |       |                         |       |
|---------------------------------------|-------|-------------------------|-------|
|                                       | Value | 95% Confidence Interval |       |
|                                       |       | Lower                   | Upper |
| Odds Ratio for Gender (Male / Female) | 2,402 | 1,596                   | 3,615 |
| For cohort E-cigarette use = Yes      | 2,347 | 1,574                   | 3,498 |
| For cohort E-cigarette use = No       | ,977  | ,967                    | ,987  |
| N of Valid Cases                      | 4056  |                         |       |

Pocket money \* E-cigarette use

| Crosstab     |          |                       |                 |       |        |
|--------------|----------|-----------------------|-----------------|-------|--------|
|              |          |                       | E-cigarette use |       | Total  |
|              |          |                       | Yes             | No    |        |
| Pocket money | No money | Count                 | 5               | 231   | 236    |
|              |          | % within Pocket money | 2,1%            | 97,9% | 100,0% |
|              | 1-9€     | Count                 | 52              | 2170  | 2222   |
|              |          | % within Pocket money | 2,3%            | 97,7% | 100,0% |

|       |                       |                       |      |       |        |
|-------|-----------------------|-----------------------|------|-------|--------|
|       | 10-19€                | Count                 | 38   | 1117  | 1155   |
|       |                       | % within Pocket money | 3,3% | 96,7% | 100,0% |
|       | >20€                  | Count                 | 17   | 417   | 434    |
|       |                       | % within Pocket money | 3,9% | 96,1% | 100,0% |
| Total | Count                 |                       | 112  | 3935  | 4047   |
|       | % within Pocket money |                       | 2,8% | 97,2% | 100,0% |

| Chi-Square Tests             |                    |    |                                          |
|------------------------------|--------------------|----|------------------------------------------|
|                              | Value              | df | Asymptotic<br>Significance (2-<br>sided) |
| Pearson Chi-Square           | 5,180 <sup>a</sup> | 3  | ,159                                     |
| Likelihood Ratio             | 4,989              | 3  | ,173                                     |
| Linear-by-Linear Association | 4,892              | 1  | ,027                                     |
| N of Valid Cases             | 4047               |    |                                          |

a. 0 cells (,0%) have expected count less than 5. The minimum expected count is 6,53.

| Risk Estimate                                    |              |
|--------------------------------------------------|--------------|
|                                                  | Value        |
| Odds Ratio for Pocket money<br>(No money / 1-9€) | <sup>a</sup> |

a. Risk Estimate statistics cannot be computed. They are only computed for a 2\*2 table without empty cells.

Father's education \* E-cigarette use

| Crosstab           |                      |                             |                 |       |        |
|--------------------|----------------------|-----------------------------|-----------------|-------|--------|
|                    |                      |                             | E-cigarette use |       | Total  |
|                    |                      |                             | Yes             | No    |        |
| Father's education | High school or above | Count                       | 66              | 2618  | 2684   |
|                    |                      | % within Father's education | 2,5%            | 97,5% | 100,0% |

|       |                        |                             |      |       |        |
|-------|------------------------|-----------------------------|------|-------|--------|
|       | Middle school or below | Count                       | 39   | 992   | 1031   |
|       |                        | % within Father's education | 3,8% | 96,2% | 100,0% |
| Total |                        | Count                       | 105  | 3610  | 3715   |
|       |                        | % within Father's education | 2,8% | 97,2% | 100,0% |

Chi-Square Tests

|                                    | Value              | df | Asymptotic<br>Significance (2-<br>sided) | Exact Sig. (2-<br>sided) | Exact Sig. (1-<br>sided) |
|------------------------------------|--------------------|----|------------------------------------------|--------------------------|--------------------------|
| Pearson Chi-Square                 | 4,752 <sup>a</sup> | 1  | ,029                                     |                          |                          |
| Continuity Correction <sup>b</sup> | 4,282              | 1  | ,039                                     |                          |                          |
| Likelihood Ratio                   | 4,489              | 1  | ,034                                     |                          |                          |
| Fisher's Exact Test                |                    |    |                                          | ,035                     | ,021                     |
| Linear-by-Linear Association       | 4,751              | 1  | ,029                                     |                          |                          |
| N of Valid Cases                   | 3715               |    |                                          |                          |                          |

a. 0 cells (,0%) have expected count less than 5. The minimum expected count is 29,14.

b. Computed only for a 2x2 table

Risk Estimate

|                                                                                         | Value | 95% Confidence Interval |       |
|-----------------------------------------------------------------------------------------|-------|-------------------------|-------|
|                                                                                         |       | Lower                   | Upper |
| Odds Ratio for Father's<br>education (High school or above<br>/ Middle school or below) | ,641  | ,429                    | ,959  |
| For cohort E-cigarette use = Yes                                                        | ,650  | ,440                    | ,959  |
| For cohort E-cigarette use = No                                                         | 1,014 | 1,000                   | 1,028 |
| N of Valid Cases                                                                        | 3715  |                         |       |

Mother's education \* E-cigarette use

Crosstab

|                 |       |
|-----------------|-------|
| E-cigarette use | Total |
|-----------------|-------|



|                    |                        |                             | Yes  | No    |        |
|--------------------|------------------------|-----------------------------|------|-------|--------|
| Mother's education | High school or above   | Count                       | 80   | 2894  | 2974   |
|                    |                        | % within Mother's education | 2,7% | 97,3% | 100,0% |
|                    | Middle school or below | Count                       | 31   | 798   | 829    |
|                    |                        | % within Mother's education | 3,7% | 96,3% | 100,0% |
| Total              |                        | Count                       | 111  | 3692  | 3803   |
|                    |                        | % within Mother's education | 2,9% | 97,1% | 100,0% |

Chi-Square Tests

|                                    | Value              | df | Asymptotic<br>Significance (2-<br>sided) | Exact Sig. (2-<br>sided) | Exact Sig. (1-<br>sided) |
|------------------------------------|--------------------|----|------------------------------------------|--------------------------|--------------------------|
| Pearson Chi-Square                 | 2,520 <sup>a</sup> | 1  | ,112                                     |                          |                          |
| Continuity Correction <sup>b</sup> | 2,163              | 1  | ,141                                     |                          |                          |
| Likelihood Ratio                   | 2,377              | 1  | ,123                                     |                          |                          |
| Fisher's Exact Test                |                    |    |                                          | ,128                     | ,073                     |
| Linear-by-Linear Association       | 2,519              | 1  | ,112                                     |                          |                          |
| N of Valid Cases                   | 3803               |    |                                          |                          |                          |

a. 0 cells (,0%) have expected count less than 5. The minimum expected count is 24,20.

b. Computed only for a 2x2 table

Risk Estimate

|                                                                                   | Value | 95% Confidence Interval |       |
|-----------------------------------------------------------------------------------|-------|-------------------------|-------|
|                                                                                   |       | Lower                   | Upper |
| Odds Ratio for Mother's education (High school or above / Middle school or below) | ,712  | ,467                    | 1,085 |
| For cohort E-cigarette use = Yes                                                  | ,719  | ,479                    | 1,081 |
| For cohort E-cigarette use = No                                                   | 1,011 | ,996                    | 1,026 |
| N of Valid Cases                                                                  | 3803  |                         |       |

Family e-cig use \* E-cigarette use

Crosstab

|                  |     |                           | E-cigarette use           |       |        |
|------------------|-----|---------------------------|---------------------------|-------|--------|
|                  |     |                           | Yes                       | No    | Total  |
| Family e-cig use | Yes | Count                     | 50                        | 442   | 492    |
|                  |     | % within Family e-cig use | 10,2%                     | 89,8% | 100,0% |
|                  | No  | Count                     | 61                        | 3479  | 3540   |
|                  |     | % within Family e-cig use | 1,7%                      | 98,3% | 100,0% |
| Total            |     |                           | Count                     | 111   | 4032   |
|                  |     |                           | % within Family e-cig use | 2,8%  | 97,2%  |

Chi-Square Tests

|                                    | Value                | df | Asymptotic<br>Significance (2-<br>sided) | Exact Sig. (2-<br>sided) | Exact Sig. (1-<br>sided) |
|------------------------------------|----------------------|----|------------------------------------------|--------------------------|--------------------------|
| Pearson Chi-Square                 | 114,920 <sup>a</sup> | 1  | ,000                                     |                          |                          |
| Continuity Correction <sup>b</sup> | 111,789              | 1  | ,000                                     |                          |                          |
| Likelihood Ratio                   | 76,679               | 1  | ,000                                     |                          |                          |
| Fisher's Exact Test                |                      |    |                                          | ,000                     | ,000                     |
| Linear-by-Linear Association       | 114,892              | 1  | ,000                                     |                          |                          |
| N of Valid Cases                   | 4032                 |    |                                          |                          |                          |

a. 0 cells (,0%) have expected count less than 5. The minimum expected count is 13,54.

b. Computed only for a 2x2 table

Risk Estimate

|                                               | Value | 95% Confidence Interval |       |
|-----------------------------------------------|-------|-------------------------|-------|
|                                               |       | Lower                   | Upper |
| Odds Ratio for Family e-cig use<br>(Yes / No) | 6,452 | 4,382                   | 9,498 |
| For cohort E-cigarette use = Yes              | 5,898 | 4,107                   | 8,469 |
| For cohort E-cigarette use = No               | ,914  | ,887                    | ,942  |
| N of Valid Cases                              | 4032  |                         |       |

Family smoking \* E-cigarette use

Crosstab

|                |         |                         | E-cigarette use |       |        |
|----------------|---------|-------------------------|-----------------|-------|--------|
|                |         |                         | Yes             | No    | Total  |
| Family smoking | Someone | Count                   | 112             | 3929  | 4041   |
|                |         | % within Family smoking | 2,8%            | 97,2% | 100,0% |
|                | No one  | Count                   | 2               | 12    | 14     |
|                |         | % within Family smoking | 14,3%           | 85,7% | 100,0% |
| Total          |         | Count                   | 114             | 3941  | 4055   |
|                |         | % within Family smoking | 2,8%            | 97,2% | 100,0% |

Chi-Square Tests

|                                    | Value              | df | Asymptotic<br>Significance (2-<br>sided) | Exact Sig. (2-<br>sided) | Exact Sig. (1-<br>sided) |
|------------------------------------|--------------------|----|------------------------------------------|--------------------------|--------------------------|
| Pearson Chi-Square                 | 6,770 <sup>a</sup> | 1  | ,009                                     |                          |                          |
| Continuity Correction <sup>b</sup> | 3,211              | 1  | ,073                                     |                          |                          |
| Likelihood Ratio                   | 3,511              | 1  | ,061                                     |                          |                          |
| Fisher's Exact Test                |                    |    |                                          | ,057                     | ,057                     |
| Linear-by-Linear Association       | 6,768              | 1  | ,009                                     |                          |                          |
| N of Valid Cases                   | 4055               |    |                                          |                          |                          |

a. 1 cells (25,0%) have expected count less than 5. The minimum expected count is ,39.

b. Computed only for a 2x2 table

Risk Estimate

|                                                     | Value | 95% Confidence Interval |       |
|-----------------------------------------------------|-------|-------------------------|-------|
|                                                     |       | Lower                   | Upper |
| Odds Ratio for Family smoking<br>(Someone / No one) | ,171  | ,038                    | ,773  |
| For cohort E-cigarette use = Yes                    | ,194  | ,053                    | ,709  |
| For cohort E-cigarette use = No                     | 1,134 | ,916                    | 1,405 |
| N of Valid Cases                                    | 4055  |                         |       |

| Case Processing Summary                             |       |         |               |         |       |         |
|-----------------------------------------------------|-------|---------|---------------|---------|-------|---------|
|                                                     | Valid |         | Cases Missing |         | Total |         |
|                                                     | N     | Percent | N             | Percent | N     | Percent |
| Any combustible product (Current) * E-cigarette use | 3876  | 94,6%   | 220,000       | 5,4%    | 4096  | 100,0%  |

Any combustible product (Current) \* E-cigarette use Crosstabulation

|                                   |                                            | E-cigarette use                            |       | Total |
|-----------------------------------|--------------------------------------------|--------------------------------------------|-------|-------|
|                                   |                                            | Yes                                        | No    |       |
| Any combustible product (Current) | Yes                                        | Count                                      | 64    | 448   |
|                                   |                                            | % within Any combustible product (Current) | 12,5% | 87,5% |
|                                   | No                                         | Count                                      | 41    | 3323  |
|                                   |                                            | % within Any combustible product (Current) | 1,2%  | 98,8% |
| Total                             | Count                                      |                                            | 105   | 3771  |
|                                   | % within Any combustible product (Current) |                                            | 2,7%  | 97,3% |

Chi-Square Tests

|                                    | Value                | df | Asymptotic Significance (2-sided) | Exact Sig. (2-sided) | Exact Sig. (1-sided) |
|------------------------------------|----------------------|----|-----------------------------------|----------------------|----------------------|
| Pearson Chi-Square                 | 214,573 <sup>a</sup> | 1  | ,000                              |                      |                      |
| Continuity Correction <sup>b</sup> | 210,314              | 1  | ,000                              |                      |                      |
| Likelihood Ratio                   | 136,225              | 1  | ,000                              |                      |                      |
| Fisher's Exact Test                |                      |    |                                   | ,000                 | ,000                 |
| Linear-by-Linear Association       | 214,518              | 1  | ,000                              |                      |                      |
| N of Valid Cases                   | 3876                 |    |                                   |                      |                      |

a. 0 cells (,0%) have expected count less than 5. The minimum expected count is 13,87.

b. Computed only for a 2x2 table

Risk Estimate

| Value | 95% Confidence Interval |
|-------|-------------------------|
|-------|-------------------------|

|                                                             |        | Lower | Upper  |
|-------------------------------------------------------------|--------|-------|--------|
| Odds Ratio for Any combustible product (Current) (Yes / No) | 11,578 | 7,728 | 17,347 |
| For cohort E-cigarette use = Yes                            | 10,256 | 7,008 | 15,011 |
| For cohort E-cigarette use = No                             | ,886   | ,857  | ,915   |
| N of Valid Cases                                            | 3876   |       |        |

Logistic Regression

| Case Processing Summary       |                      |      |         |
|-------------------------------|----------------------|------|---------|
| Unweighted Cases <sup>a</sup> |                      | N    | Percent |
| Selected Cases                | Included in Analysis | 3523 | 86,0    |
|                               | Missing Cases        | 573  | 14,0    |
|                               | Total                | 4096 | 100,0   |
| Unselected Cases              |                      | 0    | ,0      |
| Total                         |                      | 4096 | 100,0   |

a. If weight is in effect, see classification table for the total number of cases.

Dependent Variable Encoding

| Original Value | Internal Value |
|----------------|----------------|
| Yes            | 0              |
| No             | 1              |

| Categorical Variables Codings |              |           |                  |       |
|-------------------------------|--------------|-----------|------------------|-------|
|                               |              | Frequency | Parameter coding |       |
|                               |              |           | (1)              | (2)   |
| Age                           | 13 years old | 1272      | ,000             | ,000  |
|                               | 14 years old | 1229      | 1,000            | ,000  |
|                               | 15 years old | 1022      | ,000             | 1,000 |
| Gender                        | Male         | 1773      | ,000             |       |
|                               | Female       | 1750      | 1,000            |       |
| Family e-cig use              | Yes          | 446       | ,000             |       |

|                         |                        |      |       |  |
|-------------------------|------------------------|------|-------|--|
|                         | No                     | 3077 | 1,000 |  |
| Any combustible product | Yes                    | 470  | ,000  |  |
| (Current)               | No                     | 3053 | 1,000 |  |
| Father's education      | High school or above   | 2601 | ,000  |  |
|                         | Middle school or below | 922  | 1,000 |  |

Block 0: Beginning Block

| Classification Table <sup>a,b</sup> |                    |     |                 |      |            |
|-------------------------------------|--------------------|-----|-----------------|------|------------|
|                                     |                    |     | Predicted       |      |            |
|                                     |                    |     | E-cigarette use |      | Percentage |
|                                     |                    |     | Yes             | No   | Correct    |
| Step 0                              | E-cigarette use    | Yes | 0               | 95   | ,0         |
|                                     |                    | No  | 0               | 3437 | 100,0      |
|                                     | Overall Percentage |     |                 |      | 97,3       |

- a. Constant is included in the model.
- b. The cut value is ,500

| Variables in the Equation |          |       |      |          |    |      |        |
|---------------------------|----------|-------|------|----------|----|------|--------|
|                           |          | B     | S.E. | Wald     | df | Sig. | Exp(B) |
| Step 0                    | Constant | 3,588 | ,104 | 1190,846 | 1  | ,000 | 36,159 |

| Variables not in the Equation |           |                                         |         |    |      |
|-------------------------------|-----------|-----------------------------------------|---------|----|------|
|                               |           |                                         | Score   | df | Sig. |
| Step 0                        | Variables | Age                                     | 29,051  | 2  | ,000 |
|                               |           | Age(1)                                  | ,160    | 1  | ,689 |
|                               |           | Age(2)                                  | 20,925  | 1  | ,000 |
|                               |           | Gender(1)                               | 23,184  | 1  | ,000 |
|                               |           | Father's education(1)                   | 2,435   | 1  | ,119 |
|                               |           | Any combustible product<br>(Current)(1) | 190,153 | 1  | ,000 |
|                               |           | Family e-cig use(1)                     | 96,512  | 1  | ,000 |

|                    |         |   |      |
|--------------------|---------|---|------|
| Overall Statistics | 295,546 | 6 | ,000 |
|--------------------|---------|---|------|

Block 1: Method = Enter

Omnibus Tests of Model Coefficients

|        |       | Chi-square | df | Sig. |
|--------|-------|------------|----|------|
| Step 1 | Step  | 200,663    | 6  | ,000 |
|        | Block | 200,663    | 6  | ,000 |
|        | Model | 200,663    | 6  | ,000 |

Model Summary

| Step | -2 Log likelihood    | Cox & Snell R Square | Nagelkerke R Square |
|------|----------------------|----------------------|---------------------|
| 1    | 674,236 <sup>a</sup> | ,055                 | ,252                |

a. Estimation terminated at iteration number 8 because parameter estimates changed by less than ,001.

Hosmer and Lemeshow Test

| Step | Chi-square | df | Sig. |
|------|------------|----|------|
| 1    | 6,826      | 8  | ,556 |

Contingency Table for Hosmer and Lemeshow Test

|        |   | E-cigarette use = Yes |          | E-cigarette use = No |          | Total |
|--------|---|-----------------------|----------|----------------------|----------|-------|
|        |   | Observed              | Expected | Observed             | Expected |       |
| Step 1 | 1 | 59                    | 56,243   | 307                  | 309,536  | 366   |
|        | 2 | 16                    | 14,465   | 328                  | 329,541  | 344   |
|        | 3 | 8                     | 6,665    | 347                  | 348,335  | 355   |
|        | 4 | 3                     | 3,384    | 219                  | 218,921  | 222   |
|        | 5 | 2                     | 4,113    | 330                  | 328,118  | 332   |
|        | 6 | 4                     | 1,957    | 234                  | 235,871  | 238   |
|        | 7 | 0                     | 1,864    | 269                  | 266,780  | 269   |

|  |    |   |       |     |         |     |
|--|----|---|-------|-----|---------|-----|
|  | 8  | 2 | 2,606 | 417 | 416,956 | 420 |
|  | 9  | 1 | 2,413 | 460 | 458,937 | 461 |
|  | 10 | 0 | 1,354 | 526 | 524,422 | 526 |

Classification Table<sup>a</sup>

|        |                    |     | Predicted       |      |            |
|--------|--------------------|-----|-----------------|------|------------|
|        |                    |     | E-cigarette use |      | Percentage |
|        | Observed           |     | Yes             | No   | Correct    |
| Step 1 | E-cigarette use    | Yes | 2               | 93   | 2,5        |
|        |                    | No  | 4               | 3433 | 99,9       |
|        | Overall Percentage |     |                 |      | 97,3       |

a. The cut value is ,500

| Variables in the Equation |                                      |        |      |        |    |      |        |                    |        |
|---------------------------|--------------------------------------|--------|------|--------|----|------|--------|--------------------|--------|
|                           |                                      | B      | S.E. | Wald   | df | Sig. | Exp(B) | 95% C.I.for EXP(B) |        |
|                           |                                      |        |      |        |    |      |        | Lower              | Upper  |
| Step 1 <sup>a</sup>       | Age                                  |        |      | 9,862  | 2  | ,007 |        |                    |        |
|                           | Age(1)                               | -,696  | ,341 | 4,158  | 1  | ,041 | ,499   | ,255               | ,973   |
|                           | Age(2)                               | -1,053 | ,338 | 9,709  | 1  | ,002 | ,349   | ,180               | ,677   |
|                           | Gender(1)                            | ,942   | ,252 | 13,946 | 1  | ,000 | 2,564  | 1,564              | 4,203  |
|                           | Father's education(1)                | -,233  | ,236 | ,976   | 1  | ,323 | ,792   | ,499               | 1,258  |
|                           | Any combustible product (Current)(1) | 2,060  | ,230 | 80,527 | 1  | ,000 | 7,849  | 5,004              | 12,309 |
|                           | Family e-cig use(1)                  | 1,745  | ,229 | 57,876 | 1  | ,000 | 5,724  | 3,652              | 8,973  |
|                           | Constant                             | 1,270  | ,363 | 12,220 | 1  | ,000 | 3,561  |                    |        |

a. Variable(s) entered on step 1: Age, Gender, Father's education, Any combustible product (Current), Family e-cig use.

NB.: For the Age variable, SPSS produced adjusted odds ratios for the inverse association (1/x), so when this was presented in the Results, the multiplicative inverse numbers are shown.



Crosstabs

| Case Processing Summary                         |                   |         |               |         |          |         |
|-------------------------------------------------|-------------------|---------|---------------|---------|----------|---------|
|                                                 | Valid             |         | Cases Missing |         | Total    |         |
|                                                 | N                 | Percent | N             | Percent | N        | Percent |
| Age * Susceptibility to smoking?                | 2510              | 99,3%   | 17,426        | 0,7%    | 2527,426 | 100,0%  |
| Gender * Susceptibility to smoking?             | 2510              | 99,3%   | 17,426        | 0,7%    | 2527,426 | 100,0%  |
| Pocket money * Susceptibility to smoking?       | 2504 <sup>a</sup> | 99,1%   | 23,426        | 0,9%    | 2527,426 | 100,0%  |
| Father's education * Susceptibility to smoking? | 2297 <sup>a</sup> | 90,9%   | 230,426       | 9,1%    | 2527,426 | 100,0%  |
| Mother's education * Susceptibility to smoking? | 2350 <sup>a</sup> | 93,0%   | 177,426       | 7,0%    | 2527,426 | 100,0%  |
| Ever e-cig use * Susceptibility to smoking?     | 2508 <sup>a</sup> | 99,2%   | 19,426        | 0,8%    | 2527,426 | 100,0%  |
| Family e-cig use * Susceptibility to smoking?   | 2502 <sup>a</sup> | 99,0%   | 25,426        | 1,0%    | 2527,426 | 100,0%  |
| Family smoking * Susceptibility to smoking?     | 2510 <sup>a</sup> | 99,3%   | 17,426        | 0,7%    | 2527,426 | 100,0%  |
| Ever shisha use * Susceptibility to smoking?    | 2481 <sup>a</sup> | 98,2%   | 46,426        | 1,8%    | 2527,426 | 100,0%  |

a. Number of valid cases is different from the total count in the crosstabulation table because the cell counts have been rounded.

Age \* Susceptibility to smoking?

| Crosstab |              |              |                            |       |        |
|----------|--------------|--------------|----------------------------|-------|--------|
|          |              |              | Susceptibility to smoking? |       | Total  |
|          |              |              | 1                          | 2     |        |
| Age      | 13 years old | Count        | 105                        | 993   | 1098   |
|          |              | % within Age | 9,6%                       | 90,4% | 100,0% |

|       |              |              |       |       |        |
|-------|--------------|--------------|-------|-------|--------|
|       | 14 years old | Count        | 133   | 732   | 865    |
|       |              | % within Age | 15,4% | 84,6% | 100,0% |
|       | 15 years old | Count        | 85    | 462   | 547    |
|       |              | % within Age | 15,5% | 84,5% | 100,0% |
| Total |              | Count        | 323   | 2187  | 2510   |
|       |              | % within Age | 12,9% | 87,1% | 100,0% |

| Chi-Square Tests             |                     |    |                                          |
|------------------------------|---------------------|----|------------------------------------------|
|                              | Value               | df | Asymptotic<br>Significance (2-<br>sided) |
| Pearson Chi-Square           | 19,030 <sup>a</sup> | 2  | ,000                                     |
| Likelihood Ratio             | 19,503              | 2  | ,000                                     |
| Linear-by-Linear Association | 15,159              | 1  | ,000                                     |
| N of Valid Cases             | 2510                |    |                                          |

a. 0 cells (,0%) have expected count less than 5. The minimum expected count is 70,39.

| Risk Estimate                                    |              |
|--------------------------------------------------|--------------|
|                                                  | Value        |
| Odds Ratio for Age (13 years old / 14 years old) | <sup>a</sup> |

a. Risk Estimate statistics cannot be computed. They are only computed for a 2\*2 table without empty cells.

Gender \* Susceptibility to smoking?

| Crosstab |      |                            |       |       |        |
|----------|------|----------------------------|-------|-------|--------|
|          |      | Susceptibility to smoking? |       |       |        |
|          |      | 1                          | 2     | Total |        |
| Gender   | Male | Count                      | 139   | 1096  | 1235   |
|          |      | % within Gender            | 11,3% | 88,7% | 100,0% |

|       |        |                 |       |       |        |
|-------|--------|-----------------|-------|-------|--------|
|       | Female | Count           | 184   | 1091  | 1275   |
|       |        | % within Gender | 14,4% | 85,6% | 100,0% |
| Total |        | Count           | 323   | 2187  | 2510   |
|       |        | % within Gender | 12,9% | 87,1% | 100,0% |

| Chi-Square Tests                   |                    |    |                                          |                          |                          |
|------------------------------------|--------------------|----|------------------------------------------|--------------------------|--------------------------|
|                                    | Value              | df | Asymptotic<br>Significance (2-<br>sided) | Exact Sig. (2-<br>sided) | Exact Sig. (1-<br>sided) |
| Pearson Chi-Square                 | 5,645 <sup>a</sup> | 1  | ,018                                     |                          |                          |
| Continuity Correction <sup>b</sup> | 5,365              | 1  | ,021                                     |                          |                          |
| Likelihood Ratio                   | 5,664              | 1  | ,017                                     |                          |                          |
| Fisher's Exact Test                |                    |    |                                          | ,020                     | ,010                     |
| Linear-by-Linear Association       | 5,643              | 1  | ,018                                     |                          |                          |
| N of Valid Cases                   | 2510               |    |                                          |                          |                          |

a. 0 cells (,0%) have expected count less than 5. The minimum expected count is 158,93.

b. Computed only for a 2x2 table

| Risk Estimate                             |       |                         |       |
|-------------------------------------------|-------|-------------------------|-------|
|                                           | Value | 95% Confidence Interval |       |
|                                           |       | Lower                   | Upper |
| Odds Ratio for Gender (Male / Female)     | ,752  | ,594                    | ,952  |
| For cohort Susceptibility to smoking? = 1 | ,780  | ,635                    | ,958  |
| For cohort Susceptibility to smoking? = 2 | 1,037 | 1,006                   | 1,069 |
| N of Valid Cases                          | 2510  |                         |       |

Pocket money \* Susceptibility to smoking?

Crosstab

Susceptibility to smoking?

Total

|              |                       |                       | 1     | 2      |        |
|--------------|-----------------------|-----------------------|-------|--------|--------|
| Pocket money | No money              | Count                 | 12    | 143    | 155    |
|              |                       | % within Pocket money | 7,7%  | 92,3%  | 100,0% |
|              | 1-9€                  | Count                 | 158   | 1329   | 1487   |
|              |                       | % within Pocket money | 10,6% | 89,4%  | 100,0% |
|              | 10-19€                | Count                 | 121   | 551    | 672    |
|              |                       | % within Pocket money | 18,0% | 82,0%  | 100,0% |
|              | >20€                  | Count                 | 32    | 158    | 190    |
|              |                       | % within Pocket money | 16,8% | 83,2%  | 100,0% |
| Total        | Count                 | 323                   | 2181  | 2504   |        |
|              | % within Pocket money | 12,9%                 | 87,1% | 100,0% |        |

Chi-Square Tests

|                              | Value               | df | Asymptotic<br>Significance (2-<br>sided) |
|------------------------------|---------------------|----|------------------------------------------|
| Pearson Chi-Square           | 28,739 <sup>a</sup> | 3  | ,000                                     |
| Likelihood Ratio             | 27,984              | 3  | ,000                                     |
| Linear-by-Linear Association | 23,074              | 1  | ,000                                     |
| N of Valid Cases             | 2504                |    |                                          |

a. 0 cells (,0%) have expected count less than 5. The minimum expected count is 19,99.

Risk Estimate

|                                                  | Value        |
|--------------------------------------------------|--------------|
| Odds Ratio for Pocket money<br>(No money / 1-9€) | <sup>a</sup> |

a. Risk Estimate statistics cannot be computed. They are only computed for a 2\*2 table without empty cells.

Father's education \* Susceptibility to smoking?

Crosstab

|                    |                        |                             | Susceptibility to smoking? |       |        |
|--------------------|------------------------|-----------------------------|----------------------------|-------|--------|
|                    |                        |                             | 1                          | 2     | Total  |
| Father's education | High school or above   | Count                       | 230                        | 1515  | 1745   |
|                    |                        | % within Father's education | 13,2%                      | 86,8% | 100,0% |
|                    | Middle school or below | Count                       | 65                         | 487   | 552    |
|                    |                        | % within Father's education | 11,8%                      | 88,2% | 100,0% |
| Total              |                        | Count                       | 295                        | 2002  | 2297   |
|                    |                        | % within Father's education | 12,8%                      | 87,2% | 100,0% |

Chi-Square Tests

|                                    | Value             | df | Asymptotic<br>Significance (2-<br>sided) | Exact Sig. (2-<br>sided) | Exact Sig. (1-<br>sided) |
|------------------------------------|-------------------|----|------------------------------------------|--------------------------|--------------------------|
| Pearson Chi-Square                 | ,740 <sup>a</sup> | 1  | ,390                                     |                          |                          |
| Continuity Correction <sup>b</sup> | ,619              | 1  | ,431                                     |                          |                          |
| Likelihood Ratio                   | ,752              | 1  | ,386                                     |                          |                          |
| Fisher's Exact Test                |                   |    |                                          | ,422                     | ,217                     |
| Linear-by-Linear Association       | ,739              | 1  | ,390                                     |                          |                          |
| N of Valid Cases                   | 2297              |    |                                          |                          |                          |

- a. 0 cells (,0%) have expected count less than 5. The minimum expected count is 70,89.
- b. Computed only for a 2x2 table

Risk Estimate

|                                                                                   | Value | 95% Confidence Interval |       |
|-----------------------------------------------------------------------------------|-------|-------------------------|-------|
|                                                                                   |       | Lower                   | Upper |
| Odds Ratio for Father's education (High school or above / Middle school or below) | 1,137 | ,848                    | 1,526 |
| For cohort Susceptibility to smoking? = 1                                         | 1,119 | ,865                    | 1,449 |
| For cohort Susceptibility to smoking? = 2                                         | ,984  | ,950                    | 1,020 |
| N of Valid Cases                                                                  | 2297  |                         |       |

Mother's education \* Susceptibility to smoking?

| Crosstab           |                        |                             |                            |       |        |
|--------------------|------------------------|-----------------------------|----------------------------|-------|--------|
|                    |                        |                             | Susceptibility to smoking? |       |        |
|                    |                        |                             | 1                          | 2     | Total  |
| Mother's education | High school or above   | Count                       | 257                        | 1642  | 1899   |
|                    |                        | % within Mother's education | 13,5%                      | 86,5% | 100,0% |
|                    | Middle school or below | Count                       | 52                         | 399   | 451    |
|                    |                        | % within Mother's education | 11,5%                      | 88,5% | 100,0% |
| Total              |                        | Count                       | 309                        | 2041  | 2350   |
|                    |                        | % within Mother's education | 13,1%                      | 86,9% | 100,0% |

| Chi-Square Tests                   |                    |    |                                          |                          |                          |
|------------------------------------|--------------------|----|------------------------------------------|--------------------------|--------------------------|
|                                    | Value              | df | Asymptotic<br>Significance (2-<br>sided) | Exact Sig. (2-<br>sided) | Exact Sig. (1-<br>sided) |
| Pearson Chi-Square                 | 1,281 <sup>a</sup> | 1  | ,258                                     |                          |                          |
| Continuity Correction <sup>b</sup> | 1,112              | 1  | ,292                                     |                          |                          |
| Likelihood Ratio                   | 1,318              | 1  | ,251                                     |                          |                          |
| Fisher's Exact Test                |                    |    |                                          | ,278                     | ,146                     |
| Linear-by-Linear Association       | 1,280              | 1  | ,258                                     |                          |                          |
| N of Valid Cases                   | 2350               |    |                                          |                          |                          |

a. 0 cells (,0%) have expected count less than 5. The minimum expected count is 59,30.

b. Computed only for a 2x2 table

| Risk Estimate                                                                     |       |                         |       |
|-----------------------------------------------------------------------------------|-------|-------------------------|-------|
|                                                                                   | Value | 95% Confidence Interval |       |
|                                                                                   |       | Lower                   | Upper |
| Odds Ratio for Mother's education (High school or above / Middle school or below) | 1,201 | ,874                    | 1,650 |

|                                           |       |      |       |
|-------------------------------------------|-------|------|-------|
| For cohort Susceptibility to smoking? = 1 | 1,174 | ,887 | 1,553 |
| For cohort Susceptibility to smoking? = 2 | ,977  | ,941 | 1,015 |
| N of Valid Cases                          | 2350  |      |       |

Ever e-cig use \* Susceptibility to smoking?

|                |                         |                         | Susceptibility to smoking? |       | Total  |
|----------------|-------------------------|-------------------------|----------------------------|-------|--------|
|                |                         |                         | 1                          | 2     |        |
| Ever e-cig use | Yes                     | Count                   | 19                         | 42    | 61     |
|                |                         | % within Ever e-cig use | 31,1%                      | 68,9% | 100,0% |
|                | No                      | Count                   | 304                        | 2143  | 2447   |
|                |                         | % within Ever e-cig use | 12,4%                      | 87,6% | 100,0% |
| Total          | Count                   |                         | 323                        | 2185  | 2508   |
|                | % within Ever e-cig use |                         | 12,9%                      | 87,1% | 100,0% |

| Chi-Square Tests                   |                     |    |                                   |                      |                      |
|------------------------------------|---------------------|----|-----------------------------------|----------------------|----------------------|
|                                    | Value               | df | Asymptotic Significance (2-sided) | Exact Sig. (2-sided) | Exact Sig. (1-sided) |
| Pearson Chi-Square                 | 18,597 <sup>a</sup> | 1  | ,000                              |                      |                      |
| Continuity Correction <sup>b</sup> | 16,966              | 1  | ,000                              |                      |                      |
| Likelihood Ratio                   | 14,249              | 1  | ,000                              |                      |                      |
| Fisher's Exact Test                |                     |    |                                   | ,000                 | ,000                 |
| Linear-by-Linear Association       | 18,590              | 1  | ,000                              |                      |                      |
| N of Valid Cases                   | 2508                |    |                                   |                      |                      |

- a. 0 cells (,0%) have expected count less than 5. The minimum expected count is 7,86.
- b. Computed only for a 2x2 table

Risk Estimate

|                                           | Value | 95% Confidence Interval |       |
|-------------------------------------------|-------|-------------------------|-------|
|                                           |       | Lower                   | Upper |
| Odds Ratio for Ever e-cig use (Yes / No)  | 3,189 | 1,831                   | 5,555 |
| For cohort Susceptibility to smoking? = 1 | 2,507 | 1,701                   | 3,694 |
| For cohort Susceptibility to smoking? = 2 | ,786  | ,664                    | ,931  |
| N of Valid Cases                          | 2508  |                         |       |

Family e-cig use \* Susceptibility to smoking?

Crosstab

|                  |                           |                           | Susceptibility to smoking? |       | Total  |
|------------------|---------------------------|---------------------------|----------------------------|-------|--------|
|                  |                           |                           | 1                          | 2     |        |
| Family e-cig use | Yes                       | Count                     | 36                         | 209   | 245    |
|                  |                           | % within Family e-cig use | 14,7%                      | 85,3% | 100,0% |
|                  | No                        | Count                     | 286                        | 1971  | 2257   |
|                  |                           | % within Family e-cig use | 12,7%                      | 87,3% | 100,0% |
| Total            | Count                     |                           | 322                        | 2180  | 2502   |
|                  | % within Family e-cig use |                           | 12,9%                      | 87,1% | 100,0% |

Chi-Square Tests

|                                    | Value             | df | Asymptotic Significance (2-sided) | Exact Sig. (2-sided) | Exact Sig. (1-sided) |
|------------------------------------|-------------------|----|-----------------------------------|----------------------|----------------------|
| Pearson Chi-Square                 | ,806 <sup>a</sup> | 1  | ,369                              |                      |                      |
| Continuity Correction <sup>b</sup> | ,636              | 1  | ,425                              |                      |                      |
| Likelihood Ratio                   | ,779              | 1  | ,377                              |                      |                      |
| Fisher's Exact Test                |                   |    |                                   | ,366                 | ,210                 |
| Linear-by-Linear Association       | ,806              | 1  | ,369                              |                      |                      |
| N of Valid Cases                   | 2502              |    |                                   |                      |                      |

a. 0 cells (,0%) have expected count less than 5. The minimum expected count is 31,53.

b. Computed only for a 2x2 table



| Risk Estimate                              |       |                         |       |
|--------------------------------------------|-------|-------------------------|-------|
|                                            | Value | 95% Confidence Interval |       |
|                                            |       | Lower                   | Upper |
| Odds Ratio for Family e-cig use (Yes / No) | 1,187 | ,816                    | 1,727 |
| For cohort Susceptibility to smoking? = 1  | 1,160 | ,842                    | 1,598 |
| For cohort Susceptibility to smoking? = 2  | ,977  | ,925                    | 1,031 |
| N of Valid Cases                           | 2502  |                         |       |

Family smoking \* Susceptibility to smoking?

| Crosstab       |         |                         |                            |       |        |
|----------------|---------|-------------------------|----------------------------|-------|--------|
|                |         |                         | Susceptibility to smoking? |       |        |
|                |         |                         | 1                          | 2     | Total  |
| Family smoking | Someone | Count                   | 322                        | 2183  | 2505   |
|                |         | % within Family smoking | 12,9%                      | 87,1% | 100,0% |
|                | No one  | Count                   | 1                          | 4     | 5      |
|                |         | % within Family smoking | 20,0%                      | 80,0% | 100,0% |
| Total          |         | Count                   | 323                        | 2187  | 2510   |
|                |         | % within Family smoking | 12,9%                      | 87,1% | 100,0% |

| Chi-Square Tests                   |                   |    |                                   |                      |                      |
|------------------------------------|-------------------|----|-----------------------------------|----------------------|----------------------|
|                                    | Value             | df | Asymptotic Significance (2-sided) | Exact Sig. (2-sided) | Exact Sig. (1-sided) |
| Pearson Chi-Square                 | ,227 <sup>a</sup> | 1  | ,634                              |                      |                      |
| Continuity Correction <sup>b</sup> | ,000              | 1  | 1,000                             |                      |                      |
| Likelihood Ratio                   | ,199              | 1  | ,655                              |                      |                      |
| Fisher's Exact Test                |                   |    |                                   | ,498                 | ,498                 |

|                              |      |   |      |  |  |
|------------------------------|------|---|------|--|--|
| Linear-by-Linear Association | ,227 | 1 | ,634 |  |  |
| N of Valid Cases             | 2510 |   |      |  |  |

- a. 2 cells (50,0%) have expected count less than 5. The minimum expected count is ,64.
- b. Computed only for a 2x2 table

| Risk Estimate                                       |       |                         |       |
|-----------------------------------------------------|-------|-------------------------|-------|
|                                                     | Value | 95% Confidence Interval |       |
|                                                     |       | Lower                   | Upper |
| Odds Ratio for Family smoking<br>(Someone / No one) | ,590  | ,066                    | 5,295 |
| For cohort Susceptibility to<br>smoking? = 1        | ,643  | ,111                    | 3,721 |
| For cohort Susceptibility to<br>smoking? = 2        | 1,089 | ,703                    | 1,689 |
| N of Valid Cases                                    | 2510  |                         |       |

## Logistic Regression

| Case Processing Summary       |                      |      |         |
|-------------------------------|----------------------|------|---------|
| Unweighted Cases <sup>a</sup> |                      | N    | Percent |
| Selected Cases                | Included in Analysis | 2491 | 98,6    |
|                               | Missing Cases        | 35   | 1,4     |
|                               | Total                | 2526 | 100,0   |
| Unselected Cases              |                      | 0    | ,0      |
| Total                         |                      | 2526 | 100,0   |

- a. If weight is in effect, see classification table for the total number of cases.

## Dependent Variable Encoding

| Original Value | Internal Value |
|----------------|----------------|
| 1              | 0              |
| 2              | 1              |

| Categorical Variables Codings |              |           |                  |       |       |
|-------------------------------|--------------|-----------|------------------|-------|-------|
|                               |              | Frequency | Parameter coding |       |       |
|                               |              |           | (1)              | (2)   | (3)   |
| Pocket money                  | No money     | 167       | ,000             | ,000  | ,000  |
|                               | 1-9€         | 1487      | 1,000            | ,000  | ,000  |
|                               | 10-19€       | 656       | ,000             | 1,000 | ,000  |
|                               | >20€         | 181       | ,000             | ,000  | 1,000 |
| Age                           | 13 years old | 1091      | ,000             | ,000  |       |
|                               | 14 years old | 844       | 1,000            | ,000  |       |
|                               | 15 years old | 556       | ,000             | 1,000 |       |
| Ever e-cig use                | Yes          | 60        | ,000             |       |       |
|                               | No           | 2431      | 1,000            |       |       |
| Gender                        | Male         | 1204      | ,000             |       |       |
|                               | Female       | 1287      | 1,000            |       |       |

Block 0: Beginning Block

| Classification Table <sup>a,b</sup> |                            |   |   |                            |            |
|-------------------------------------|----------------------------|---|---|----------------------------|------------|
|                                     |                            |   |   | Predicted                  |            |
|                                     |                            |   |   | Susceptibility to smoking? | Percentage |
|                                     |                            |   |   | 1                          | 2          |
|                                     |                            |   |   | Correct                    |            |
| Step 0                              | Susceptibility to smoking? | 1 | 0 | 321                        | ,0         |
|                                     |                            | 2 | 0 | 2178                       | 100,0      |
|                                     | Overall Percentage         |   |   |                            | 87,2       |

a. Constant is included in the model.

b. The cut value is ,500

| Variables in the Equation |          |       |      |          |    |      |        |
|---------------------------|----------|-------|------|----------|----|------|--------|
|                           |          | B     | S.E. | Wald     | df | Sig. | Exp(B) |
| Step 0                    | Constant | 1,915 | ,060 | 1025,831 | 1  | ,000 | 6,784  |

| Variables not in the Equation |                    |                   |        |    |      |
|-------------------------------|--------------------|-------------------|--------|----|------|
|                               |                    |                   | Score  | df | Sig. |
| Step 0                        | Variables          | Age               | 19,155 | 2  | ,000 |
|                               |                    | Age(1)            | 7,371  | 1  | ,007 |
|                               |                    | Age(2)            | 4,546  | 1  | ,033 |
|                               |                    | Gender(1)         | 5,571  | 1  | ,018 |
|                               |                    | Pocket money      | 29,123 | 3  | ,000 |
|                               |                    | Pocket money(1)   | 17,047 | 1  | ,000 |
|                               |                    | Pocket money(2)   | 21,675 | 1  | ,000 |
|                               |                    | Pocket money(3)   | 2,839  | 1  | ,092 |
|                               |                    | Ever e-cig use(1) | 18,317 | 1  | ,000 |
|                               | Overall Statistics |                   | 65,849 | 7  | ,000 |

Block 1: Method = Enter

| Omnibus Tests of Model Coefficients |       |            |    |      |
|-------------------------------------|-------|------------|----|------|
|                                     |       | Chi-square | df | Sig. |
| Step 1                              | Step  | 62,050     | 7  | ,000 |
|                                     | Block | 62,050     | 7  | ,000 |
|                                     | Model | 62,050     | 7  | ,000 |

| Model Summary |                       |                      |                     |
|---------------|-----------------------|----------------------|---------------------|
| Step          | -2 Log likelihood     | Cox & Snell R Square | Nagelkerke R Square |
| 1             | 1854,831 <sup>a</sup> | ,025                 | ,046                |

a. Estimation terminated at iteration number 5 because parameter estimates changed by less than ,001.

| Hosmer and Lemeshow Test |            |    |      |
|--------------------------|------------|----|------|
| Step                     | Chi-square | df | Sig. |
| 1                        | 6,968      | 7  | ,432 |

Contingency Table for Hosmer and Lemeshow Test

|        |   | Susceptibility to smoking? = 1 |          | Susceptibility to smoking? = 2 |          | Total |
|--------|---|--------------------------------|----------|--------------------------------|----------|-------|
|        |   | Observed                       | Expected | Observed                       | Expected |       |
| Step 1 | 1 | 66                             | 61,869   | 187                            | 191,466  | 253   |
|        | 2 | 48                             | 47,019   | 216                            | 217,076  | 264   |
|        | 3 | 32                             | 35,650   | 203                            | 200,074  | 236   |
|        | 4 | 22                             | 22,769   | 140                            | 139,270  | 162   |
|        | 5 | 29                             | 35,400   | 226                            | 218,913  | 254   |
|        | 6 | 31                             | 30,317   | 248                            | 248,972  | 279   |
|        | 7 | 32                             | 26,174   | 218                            | 223,804  | 250   |
|        | 8 | 38                             | 31,348   | 306                            | 311,853  | 343   |
|        | 9 | 24                             | 30,547   | 434                            | 426,956  | 458   |

Classification Table<sup>a</sup>

|        |                            |                            |   | Predicted  |         |
|--------|----------------------------|----------------------------|---|------------|---------|
|        |                            | Susceptibility to smoking? |   | Percentage |         |
|        |                            | Observed                   | 1 | 2          | Correct |
| Step 1 | Susceptibility to smoking? | 1                          | 0 | 321        | ,0      |
|        |                            | 2                          | 0 | 2178       | 100,0   |
|        | Overall Percentage         |                            |   |            | 87,2    |

a. The cut value is ,500

Variables in the Equation

|                     |                   | B     | S.E. | Wald   | df | Sig. | Exp(B) | 95% C.I.for EXP(B) |       |
|---------------------|-------------------|-------|------|--------|----|------|--------|--------------------|-------|
|                     |                   |       |      |        |    |      |        | Lower              | Upper |
| Step 1 <sup>a</sup> | Age               |       |      | 13,937 | 2  | ,001 |        |                    |       |
|                     | Age(1)            | -,475 | ,142 | 11,255 | 1  | ,001 | ,622   | ,471               | ,821  |
|                     | Age(2)            | -,486 | ,159 | 9,365  | 1  | ,002 | ,615   | ,450               | ,840  |
|                     | Gender(1)         | -,324 | ,123 | 6,983  | 1  | ,008 | ,723   | ,568               | ,920  |
|                     | Pocket money      |       |      | 22,613 | 3  | ,000 |        |                    |       |
|                     | Pocket money(1)   | -,321 | ,317 | 1,025  | 1  | ,311 | ,726   | ,390               | 1,350 |
|                     | Pocket money(2)   | -,881 | ,322 | 7,474  | 1  | ,006 | ,415   | ,221               | ,779  |
|                     | Pocket money(3)   | -,808 | ,364 | 4,937  | 1  | ,026 | ,446   | ,219               | ,909  |
|                     | Ever e-cig use(1) | 1,117 | ,292 | 14,675 | 1  | ,000 | 3,056  | 1,726              | 5,412 |
|                     | Constant          | 1,825 | ,415 | 19,367 | 1  | ,000 | 6,206  |                    |       |

a. Variable(s) entered on step 1: Age, Gender, Pocket money, Ever e-cig use.

NB.: For the Age and Pocket money variables, SPSS produced adjusted odds ratios for the inverse association (1/x), so when these were presented in the Results, the multiplicative inverse numbers are shown.
