# Supplementary material for: Prevalence of Electronic Cigarette Use and Its Determinants among 13-to-15-Year-Old Students in Greece: Results from the 2013 Global Youth Tobacco Survey (GYTS)
Source: MDPI journal article supplement (doi:10.3390/ijerph17051671), 2020-03-04
Supplement: s1 [file s1]

| Original Question | Analysis Variable | Question Code and Label                                                            | Unweighted Frequency | Weighted Percent |
|-------------------|-------------------|------------------------------------------------------------------------------------|----------------------|------------------|
| Q1                | CR1               | How old are you?                                                                   |                      |                  |
|                   |                   | . Missing                                                                          | 2                    | .                |
|                   |                   | 1 11 years old or younger                                                          | 3                    | 0.1%             |
|                   |                   | 2 12 years old                                                                     | 369                  | 8.0%             |
|                   |                   | 3 13 years old                                                                     | 1,528                | 33.4%            |
|                   |                   | 4 14 years old                                                                     | 1,407                | 31.0%            |
|                   |                   | 5 15 years old                                                                     | 1,161                | 24.3%            |
|                   |                   | 6 16 years old                                                                     | 108                  | 2.4%             |
|                   |                   | 7 17 years old or older                                                            | 40                   | 0.9%             |
| Q2                | CR2               | What is your sex?                                                                  |                      |                  |
|                   |                   | . Missing                                                                          | 4                    | .                |
|                   |                   | 1 Male                                                                             | 2,348                | 52.0%            |
|                   |                   | 2 Female                                                                           | 2,266                | 48.0%            |
| Q3                | GRR3              | In what grade/form are you?                                                        |                      |                  |
|                   |                   | . Missing                                                                          | 7                    | .                |
|                   |                   | 1 First grade                                                                      | 1,593                | 34.9%            |
|                   |                   | 2 Second grade                                                                     | 1,499                | 33.4%            |
|                   |                   | 3 Third grade                                                                      | 1,519                | 31.7%            |
| Q4                | GRR4              | How much money do you normally spend on your personal needs?                       |                      |                  |
|                   |                   | . Missing                                                                          | 21                   | .                |
|                   |                   | 1 Usually I have no money to spend                                                 | 299                  | 6.0%             |
|                   |                   | 2 Less than 5 €                                                                    | 1,197                | 26.0%            |
|                   |                   | 3 5 to 9 €                                                                         | 1,345                | 29.2%            |
|                   |                   | 4 10 to 14 €                                                                       | 818                  | 17.8%            |
|                   |                   | 5 15 to 19 €                                                                       | 445                  | 9.9%             |
|                   |                   | 6 20 to 24 €                                                                       | 231                  | 5.3%             |
|                   |                   | 7 25 to 29 €                                                                       | 107                  | 2.4%             |
|                   |                   | 8 More than 30 €                                                                   | 155                  | 3.4%             |
| Q5                | OR1               | Do your parents work?                                                              |                      |                  |
|                   |                   | . Missing                                                                          | 9                    | .                |
|                   |                   | 1 Father (stepfather or mother's partner) only                                     | 1,291                | 27.4%            |
|                   |                   | 2 Mother (stepmother or father's partner) only                                     | 387                  | 8.3%             |
|                   |                   | 3 Both                                                                             | 2,694                | 59.4%            |
|                   |                   | 4 Neither                                                                          | 201                  | 4.1%             |
|                   |                   | 5 Don't know                                                                       | 36                   | 0.8%             |
| Q6                | GRR6              | What level of education did your father (stepfather or mother's partner) complete? |                      |                  |
|                   |                   | . Missing                                                                          | 17                   | .                |
|                   |                   | 1 He's never gone to school                                                        | 18                   | 0.4%             |
|                   |                   | 2 He has graduated from elementary school                                          | 401                  | 9.6%             |
|                   |                   | 3 He has graduated from junior high school                                         | 714                  | 16.0%            |
|                   |                   | 4 He has graduated from high school                                                | 1,556                | 33.0%            |
|                   |                   | 5 He has graduated from university                                                 | 1,210                | 26.0%            |
|                   |                   | 6 He has completed master studies or PhD                                           | 294                  | 6.2%             |
|                   |                   | 7 Illiterate                                                                       | 7                    | 0.2%             |
|                   |                   | 8 I don't know                                                                     | 401                  | 8.6%             |
| Q7                | GRR7              | What level of education did your mother (stepmother or father's partner) complete? |                      |                  |
|                   |                   | . Missing                                                                          | 20                   | .                |
|                   |                   | 1 She's never gone to school                                                       | 25                   | 0.6%             |
|                   |                   | 2 She has graduated from elementary school                                         | 256                  | 5.8%             |

| Original Question | Analysis Variable | Question Code and Label                                                                                                                                                                  | Unweighted Frequency | Weighted Percent |
|-------------------|-------------------|------------------------------------------------------------------------------------------------------------------------------------------------------------------------------------------|----------------------|------------------|
|                   |                   | 3 She has graduated from junior high school                                                                                                                                              | 604                  | 14.0%            |
|                   |                   | 4 She has graduated from high school                                                                                                                                                     | 1,649                | 35.4%            |
|                   |                   | 5 She has graduated from university                                                                                                                                                      | 1,379                | 29.6%            |
|                   |                   | 6 She has completed master studies or PhD                                                                                                                                                | 386                  | 8.1%             |
|                   |                   | 7 Illiterate                                                                                                                                                                             | 6                    | 0.1%             |
|                   |                   | 8 I don't know                                                                                                                                                                           | 293                  | 6.4%             |
| Q8                | CR5               | Have you ever tried or experimented with cigarette smoking, even one or two puffs?                                                                                                       |                      |                  |
|                   |                   | . Missing                                                                                                                                                                                | 75                   | .                |
|                   |                   | 1 Yes                                                                                                                                                                                    | 1,380                | 30.4%            |
|                   |                   | 2 No                                                                                                                                                                                     | 3,163                | 69.6%            |
| Q9                | CR6               | How old were you when you first tried to smoke?                                                                                                                                          |                      |                  |
|                   |                   | . Missing                                                                                                                                                                                | 70                   | .                |
|                   |                   | 1 I have never tried smoking a cigarette                                                                                                                                                 | 3,220                | 70.9%            |
|                   |                   | 2 7 years old or younger                                                                                                                                                                 | 141                  | 3.2%             |
|                   |                   | 3 8 or 9 years old                                                                                                                                                                       | 92                   | 2.1%             |
|                   |                   | 4 10 or 11 years old                                                                                                                                                                     | 175                  | 4.0%             |
|                   |                   | 5 12 or 13 years old                                                                                                                                                                     | 501                  | 10.9%            |
|                   |                   | 6 14 or 15 years old                                                                                                                                                                     | 410                  | 8.6%             |
|                   |                   | 7 16 years old or older                                                                                                                                                                  | 9                    | 0.2%             |
| Q10               | CR7               | During the past 30 days, on how many days did you smoke cigarettes?                                                                                                                      |                      |                  |
|                   |                   | . Missing                                                                                                                                                                                | 125                  | .                |
|                   |                   | 1 0 days                                                                                                                                                                                 | 3,999                | 89.1%            |
|                   |                   | 2 1 or 2 days                                                                                                                                                                            | 146                  | 3.2%             |
|                   |                   | 3 3 to 5 days                                                                                                                                                                            | 53                   | 1.2%             |
|                   |                   | 4 6 to 9 days                                                                                                                                                                            | 53                   | 1.2%             |
|                   |                   | 5 10 to 19 days                                                                                                                                                                          | 62                   | 1.3%             |
|                   |                   | 6 20 to 29 days                                                                                                                                                                          | 40                   | 0.9%             |
|                   |                   | 7 All 30 days                                                                                                                                                                            | 140                  | 3.1%             |
| Q11               | CR8               | Please think about the days you smoked cigarettes during the past month (30 days). How many cigarettes did you usually smoke per day?                                                    |                      |                  |
|                   |                   | . Missing                                                                                                                                                                                | 170                  | .                |
|                   |                   | 1 I did not smoke cigarettes during the past 30 days                                                                                                                                     | 3,945                | 88.8%            |
|                   |                   | 2 Less than 1 cigarette per day                                                                                                                                                          | 111                  | 2.5%             |
|                   |                   | 3 1 cigarette per day                                                                                                                                                                    | 93                   | 2.1%             |
|                   |                   | 4 2 to 5 cigarettes per day                                                                                                                                                              | 131                  | 2.8%             |
|                   |                   | 5 6 to 10 cigarettes per day                                                                                                                                                             | 83                   | 1.7%             |
|                   |                   | 6 11 to 20 cigarettes per day                                                                                                                                                            | 47                   | 1.1%             |
|                   |                   | 7 More than 20 cigarettes per day                                                                                                                                                        | 38                   | 0.9%             |
| Q12               | OR5               | During the past 30 days, how often did you smoke hand-rolled cigarettes?                                                                                                                 |                      |                  |
|                   |                   | . Missing                                                                                                                                                                                | 113                  | .                |
|                   |                   | 1 I did not smoke hand-rolled cigarettes during the past 30 days                                                                                                                         | 4,103                | 91.1%            |
|                   |                   | 2 Less than once a week                                                                                                                                                                  | 155                  | 3.5%             |
|                   |                   | 3 At least once a week but not every day                                                                                                                                                 | 142                  | 3.2%             |
|                   |                   | 4 Every day                                                                                                                                                                              | 105                  | 2.3%             |
| Q13               | CR9               | Have you ever tried or experimented with some type of smoking tobacco products other than cigarettes from ordinary cigarettes trade (such as rolling, pipe, cigars, cigarillos, hookah)? |                      |                  |
|                   |                   | . Missing                                                                                                                                                                                | 175                  | .                |
|                   |                   | 1 Yes                                                                                                                                                                                    | 778                  | 17.1%            |
|                   |                   | 2 No                                                                                                                                                                                     | 3,665                | 82.9%            |

| Original Question | Analysis Variable | Question Code and Label                                                                                                                                         | Unweighted Frequency | Weighted Percent |
|-------------------|-------------------|-----------------------------------------------------------------------------------------------------------------------------------------------------------------|----------------------|------------------|
| Q14               | CR10              | During the past 30 days, did you use any form of smoked tobacco products other than cigarettes (such as rolling, pipe, cigars, cigarillos, hookah)?             |                      |                  |
|                   |                   | . Missing                                                                                                                                                       | 177                  | .                |
|                   |                   | 1 Yes                                                                                                                                                           | 375                  | 8.2%             |
|                   |                   | 2 No                                                                                                                                                            | 4,066                | 91.8%            |
| Q15               | GRR15             | Where do you usually smoke? (select only one response)                                                                                                          |                      |                  |
|                   |                   | . Missing                                                                                                                                                       | 40                   | .                |
|                   |                   | 1 I have never smoked                                                                                                                                           | 3,887                | 85.0%            |
|                   |                   | 2 At home                                                                                                                                                       | 96                   | 2.2%             |
|                   |                   | 3 At social events                                                                                                                                              | 51                   | 1.0%             |
|                   |                   | 4 At friends' houses                                                                                                                                            | 63                   | 1.4%             |
|                   |                   | 5 At school during the school hours                                                                                                                             | 44                   | 1.0%             |
|                   |                   | 6 Outside school during the school hours                                                                                                                        | 18                   | 0.4%             |
|                   |                   | 7 In public places (e.g. streets, cafeterias, parks, malls)                                                                                                     | 277                  | 5.7%             |
|                   |                   | 8 In other places                                                                                                                                               | 142                  | 3.3%             |
| Q16               | CR11              | Do you ever smoke or feel that you want to smoke just when you wake up in the morning?                                                                          |                      |                  |
|                   |                   | . Missing                                                                                                                                                       | 18                   | .                |
|                   |                   | 1 I have never smoked                                                                                                                                           | 3,556                | 77.4%            |
|                   |                   | 2 No, I don't smoke or ever feel that I want to smoke just when I wake up in the morning                                                                        | 783                  | 17.1%            |
|                   |                   | 3 Yes, I sometimes smoke or feel that I want to smoke just when I wake up in the morning                                                                        | 178                  | 3.8%             |
|                   |                   | 4 Yes, I always smoke or feel that I want to smoke just when I wake up in the morning                                                                           | 83                   | 1.7%             |
| Q17               | GRR17             | How long after smoking a cigarette do you start thinking about the next one?                                                                                    |                      |                  |
|                   |                   | . Missing                                                                                                                                                       | 25                   | .                |
|                   |                   | 1 I don't smoke tobacco                                                                                                                                         | 3,929                | 85.7%            |
|                   |                   | 2 I never feel a strong desire to smoke again after smoking tobacco                                                                                             | 353                  | 7.7%             |
|                   |                   | 3 Within 60 minutes                                                                                                                                             | 162                  | 3.4%             |
|                   |                   | 4 1 to 2 hours                                                                                                                                                  | 67                   | 1.5%             |
|                   |                   | 5 More than 2 hours to 4 hours                                                                                                                                  | 24                   | 0.5%             |
|                   |                   | 6 More than 4 hours but less than one full day                                                                                                                  | 17                   | 0.3%             |
|                   |                   | 7 1 to 3 days                                                                                                                                                   | 17                   | 0.4%             |
|                   |                   | 8 4 days or more                                                                                                                                                | 24                   | 0.5%             |
| Q18               | CR13              | Have you ever tried or experimented with some type of tobacco product in any way other than smoking (such as inhaled smoke, chew tobacco or tobacco candy)?     |                      |                  |
|                   |                   | . Missing                                                                                                                                                       | 66                   | .                |
|                   |                   | 1 Yes                                                                                                                                                           | 142                  | 3.5%             |
|                   |                   | 2 No                                                                                                                                                            | 4,410                | 96.5%            |
| Q19               | CR14              | During the past month (30 days), did you use some type of tobacco product in any way other than smoking (such as inhaled smoke, chew tobacco or tobacco candy)? |                      |                  |
|                   |                   | . Missing                                                                                                                                                       | 68                   | .                |
|                   |                   | 1 Yes                                                                                                                                                           | 63                   | 1.5%             |
|                   |                   | 2 No                                                                                                                                                            | 4,487                | 98.5%            |
| Q20               | GRR20             | Have you ever tried or experimented with the electronic cigarette?                                                                                              |                      |                  |
|                   |                   | . Missing                                                                                                                                                       | 43                   | .                |
|                   |                   | 1 Yes                                                                                                                                                           | 579                  | 12.3%            |
|                   |                   | 2 No                                                                                                                                                            | 3,996                | 87.7%            |
| Q21               | GRR21             | During the past 30 days, have you used the electronic cigarette?                                                                                                |                      |                  |
|                   |                   | . Missing                                                                                                                                                       | 58                   | .                |

| Original Question | Analysis Variable | Question Code and Label                                                                        | Unweighted Frequency | Weighted Percent |
|-------------------|-------------------|------------------------------------------------------------------------------------------------|----------------------|------------------|
|                   |                   | 1 Yes                                                                                          | 125                  | 2.9%             |
|                   |                   | 2 No                                                                                           | 4,435                | 97.1%            |
| Q22               | GRR22             | In your family does anyone use the electronic cigarette?                                       |                      |                  |
|                   |                   | . Missing                                                                                      | 51                   | .                |
|                   |                   | 1 Yes                                                                                          | 576                  | 12.1%            |
|                   |                   | 2 No                                                                                           | 3,991                | 87.9%            |
| Q23               | CR15              | Do you want to stop smoking now?                                                               |                      |                  |
|                   |                   | . Missing                                                                                      | 33                   | .                |
|                   |                   | 1 I have never smoked                                                                          | 3,524                | 76.8%            |
|                   |                   | 2 I don't smoke now                                                                            | 690                  | 15.3%            |
|                   |                   | 3 Yes                                                                                          | 170                  | 3.5%             |
|                   |                   | 4 No                                                                                           | 201                  | 4.4%             |
| Q24               | CR16              | During the last year (12 months), have you ever tried to quit smoking?                         |                      |                  |
|                   |                   | . Missing                                                                                      | 41                   | .                |
|                   |                   | 1 I have never smoked                                                                          | 3,581                | 78.3%            |
|                   |                   | 2 I did not smoke during the past 12 months                                                    | 477                  | 10.6%            |
|                   |                   | 3 Yes                                                                                          | 325                  | 6.9%             |
|                   |                   | 4 No                                                                                           | 194                  | 4.3%             |
| Q25               | CR17              | Do you think you would be able to quit smoking if you wanted?                                  |                      |                  |
|                   |                   | . Missing                                                                                      | 27                   | .                |
|                   |                   | 1 I don't smoke tobacco                                                                        | 3,557                | 77.5%            |
|                   |                   | 2 I don't smoke now                                                                            | 511                  | 11.3%            |
|                   |                   | 3 Yes                                                                                          | 444                  | 9.5%             |
|                   |                   | 4 No                                                                                           | 79                   | 1.7%             |
| Q26               | CR18              | Have you ever received help or advice to quit smoking? (select only one response)              |                      |                  |
|                   |                   | . Missing                                                                                      | 35                   | .                |
|                   |                   | 1 I have never smoked                                                                          | 3,683                | 80.2%            |
|                   |                   | 2 Yes, from a program or health professional                                                   | 36                   | 0.9%             |
|                   |                   | 3 Yes, from a friend                                                                           | 257                  | 5.5%             |
|                   |                   | 4 Yes, from a family member                                                                    | 122                  | 2.5%             |
|                   |                   | 5 Yes, all of the above (from a program or healthcare professional, friends or family members) | 67                   | 1.5%             |
|                   |                   | 6 No                                                                                           | 418                  | 9.4%             |
| Q27               | GRR27             | How long ago did you quit smoking?                                                             |                      |                  |
|                   |                   | . Missing                                                                                      | 40                   | .                |
|                   |                   | 1 I have never smoked                                                                          | 3,719                | 81.0%            |
|                   |                   | 2 I have not quit smoking                                                                      | 290                  | 6.3%             |
|                   |                   | 3 Less than a month                                                                            | 123                  | 2.7%             |
|                   |                   | 4 1-3 months                                                                                   | 128                  | 2.7%             |
|                   |                   | 5 4-11 months                                                                                  | 94                   | 2.2%             |
|                   |                   | 6 One year                                                                                     | 100                  | 2.2%             |
|                   |                   | 7 2 years                                                                                      | 57                   | 1.4%             |
|                   |                   | 8 3 years or more                                                                              | 67                   | 1.5%             |
| Q28               | GRR28             | What was the main reason you decided to quit smoking? (select one response only)               |                      |                  |
|                   |                   | . Missing                                                                                      | 27                   | .                |
|                   |                   | 1 I have never smoked                                                                          | 3,698                | 80.4%            |
|                   |                   | 2 I have not quit smoking                                                                      | 256                  | 5.5%             |
|                   |                   | 3 To improve my health                                                                         | 332                  | 7.4%             |
|                   |                   | 4 To save money                                                                                | 24                   | 0.6%             |

| Original Question | Analysis Variable | Question Code and Label                                                                                                                                                                                   | Unweighted Frequency | Weighted Percent |
|-------------------|-------------------|-----------------------------------------------------------------------------------------------------------------------------------------------------------------------------------------------------------|----------------------|------------------|
|                   |                   | 5 Because my family does not like it                                                                                                                                                                      | 34                   | 0.8%             |
|                   |                   | 6 Because my friends do not like it                                                                                                                                                                       | 16                   | 0.4%             |
|                   |                   | 7 Because my hair, clothes and breath smell bad                                                                                                                                                           | 51                   | 1.1%             |
|                   |                   | 8 An other reason                                                                                                                                                                                         | 180                  | 3.9%             |
| Q29               | CR19              | During the past 7 days, on how many days has anyone smoked inside your home, in your presence?                                                                                                            |                      |                  |
|                   |                   | . Missing                                                                                                                                                                                                 | 31                   | .                |
|                   |                   | 1 0 days                                                                                                                                                                                                  | 2,013                | 43.8%            |
|                   |                   | 2 1 to 2 days                                                                                                                                                                                             | 724                  | 16.1%            |
|                   |                   | 3 3 to 4 days                                                                                                                                                                                             | 405                  | 9.1%             |
|                   |                   | 4 5 to 6 days                                                                                                                                                                                             | 263                  | 5.6%             |
|                   |                   | 5 7 days                                                                                                                                                                                                  | 1,182                | 25.4%            |
| Q30               | GRR30             | Who smokes in the house?                                                                                                                                                                                  |                      |                  |
|                   |                   | . Missing                                                                                                                                                                                                 | 27                   | .                |
|                   |                   | 1 Father                                                                                                                                                                                                  | 320                  | 6.3%             |
|                   |                   | 2 Mother                                                                                                                                                                                                  | 1,301                | 27.8%            |
|                   |                   | 3 Brothers                                                                                                                                                                                                | 863                  | 19.1%            |
|                   |                   | 4 Both the parents                                                                                                                                                                                        | 2,106                | 46.8%            |
|                   |                   | 5 More than 2 persons                                                                                                                                                                                     | 1                    | 0.0%             |
| Q31               | GRR31             | How many cigarettes on average do your parents smoke inside your own home a day?                                                                                                                          |                      |                  |
|                   |                   | . Missing                                                                                                                                                                                                 | 30                   | .                |
|                   |                   | 1 0                                                                                                                                                                                                       | 271                  | 5.4%             |
|                   |                   | 2 1 to 5                                                                                                                                                                                                  | 1,032                | 21.5%            |
|                   |                   | 3 6 to 10                                                                                                                                                                                                 | 795                  | 17.4%            |
|                   |                   | 4 11 to 20                                                                                                                                                                                                | 2,486                | 55.6%            |
|                   |                   | 5 More than 20                                                                                                                                                                                            | 4                    | 0.1%             |
| Q32               | CR20              | During the past 7 days, on how many days has anyone smoked in your presence, inside any enclosed public place, other than your home (such as school, shops, restaurants, shopping malls, movie theaters)? |                      |                  |
|                   |                   | . Missing                                                                                                                                                                                                 | 42                   | .                |
|                   |                   | 1 0 days                                                                                                                                                                                                  | 1,477                | 32.7%            |
|                   |                   | 2 1 to 2 days                                                                                                                                                                                             | 1,248                | 27.1%            |
|                   |                   | 3 3 to 4 days                                                                                                                                                                                             | 692                  | 15.0%            |
|                   |                   | 4 5 to 6 days                                                                                                                                                                                             | 340                  | 7.2%             |
|                   |                   | 5 7 days                                                                                                                                                                                                  | 819                  | 17.9%            |
| Q33               | CR21              | During the past 7 days, on how many days has anyone smoked in your presence, at any outdoor public place (such as playgrounds, sidewalks, entrances to buildings, parks, beaches)?                        |                      |                  |
|                   |                   | . Missing                                                                                                                                                                                                 | 30                   | .                |
|                   |                   | 1 0 days                                                                                                                                                                                                  | 1,425                | 31.9%            |
|                   |                   | 2 1 to 2 days                                                                                                                                                                                             | 1,197                | 26.0%            |
|                   |                   | 3 3 to 4 days                                                                                                                                                                                             | 690                  | 14.9%            |
|                   |                   | 4 5 to 6 days                                                                                                                                                                                             | 371                  | 7.8%             |
|                   |                   | 5 7 days                                                                                                                                                                                                  | 905                  | 19.4%            |
| Q34               | CR22              | During the past 30 days, did you see any one smoke inside the school building or outside on school property?                                                                                              |                      |                  |
|                   |                   | . Missing                                                                                                                                                                                                 | 39                   | .                |
|                   |                   | 1 Yes                                                                                                                                                                                                     | 3,508                | 76.0%            |
|                   |                   | 2 No                                                                                                                                                                                                      | 1,071                | 24.0%            |
| Q35               | CR23              | Do you think the smoke from other people's tobacco smoking is harmful to you?                                                                                                                             |                      |                  |
|                   |                   | . Missing                                                                                                                                                                                                 | 22                   | .                |

| Original Question | Analysis Variable | Question Code and Label                                                                                                                  | Unweighted Frequency | Weighted Percent |
|-------------------|-------------------|------------------------------------------------------------------------------------------------------------------------------------------|----------------------|------------------|
|                   |                   | 1 Definitely not                                                                                                                         | 145                  | 3.4%             |
|                   |                   | 2 Probably not                                                                                                                           | 125                  | 2.9%             |
|                   |                   | 3 Probably yes                                                                                                                           | 773                  | 16.6%            |
|                   |                   | 4 Definitely yes                                                                                                                         | 3,553                | 77.1%            |
| Q36               | CR24              | Are you in favor of banning smoking inside enclosed public places (such as schools, shops, restaurants, shopping malls, movie theaters)? |                      |                  |
|                   |                   | . Missing                                                                                                                                | 52                   | .                |
|                   |                   | 1 Yes                                                                                                                                    | 3,751                | 81.9%            |
|                   |                   | 2 No                                                                                                                                     | 815                  | 18.1%            |
| Q37               | CR25              | Are you in favor of banning smoking at outdoor public places (such as playgrounds, sidewalks, entrances to buildings, parks, beaches)?   |                      |                  |
|                   |                   | . Missing                                                                                                                                | 49                   | .                |
|                   |                   | 1 Yes                                                                                                                                    | 2,573                | 57.0%            |
|                   |                   | 2 No                                                                                                                                     | 1,996                | 43.0%            |
| Q38               | GRR38             | Do you know if in Greece there is a law that bans smoking in school and public places?                                                   |                      |                  |
|                   |                   | . Missing                                                                                                                                | 36                   | .                |
|                   |                   | 1 Yes                                                                                                                                    | 2,563                | 55.5%            |
|                   |                   | 2 No                                                                                                                                     | 302                  | 6.9%             |
|                   |                   | 3 I don't know                                                                                                                           | 1,717                | 37.6%            |
| Q39               | CR26              | The last time you smoked cigarettes during the past 30 days, how did you get them? (select only one response)                            |                      |                  |
|                   |                   | . Missing                                                                                                                                | 120                  | .                |
|                   |                   | 1 I did not smoke any cigarettes during the past 30 days                                                                                 | 3,933                | 87.7%            |
|                   |                   | 2 I bought them in a store or shop                                                                                                       | 69                   | 1.7%             |
|                   |                   | 3 I bought them from a street vendor                                                                                                     | 20                   | 0.4%             |
|                   |                   | 4 I bought them at a kiosk                                                                                                               | 281                  | 5.9%             |
|                   |                   | 5 I bought them from a vending machine                                                                                                   | 9                    | 0.2%             |
|                   |                   | 6 I got them from someone else                                                                                                           | 146                  | 3.2%             |
|                   |                   | 7 I got them some other way                                                                                                              | 40                   | 0.9%             |
| Q40               | CR27              | During the past month (30 days), did anyone refuse to sell you cigarettes because of your age?                                           |                      |                  |
|                   |                   | . Missing                                                                                                                                | 104                  | .                |
|                   |                   | 1 I did not try to buy cigarettes during the past 30 days                                                                                | 3,915                | 86.8%            |
|                   |                   | 2 Yes, someone refused to sell me cigarettes because of my age                                                                           | 88                   | 2.0%             |
|                   |                   | 3 No, my age did not keep me from buying cigarettes                                                                                      | 511                  | 11.3%            |
| Q41               | OR22              | Can you purchase cigarettes or other tobacco products near your school?                                                                  |                      |                  |
|                   |                   | . Missing                                                                                                                                | 65                   | .                |
|                   |                   | 1 Yes                                                                                                                                    | 1,834                | 39.5%            |
|                   |                   | 2 No                                                                                                                                     | 1,110                | 25.0%            |
|                   |                   | 3 I don't know                                                                                                                           | 1,609                | 35.5%            |
| Q42               | CR28              | The last time you bought cigarettes during the past month (30 days), how did you buy them?                                               |                      |                  |
|                   |                   | . Missing                                                                                                                                | 99                   | .                |
|                   |                   | 1 I did not buy cigarettes during the past 30 days                                                                                       | 3,934                | 87.3%            |
|                   |                   | 2 I bought them in a pack                                                                                                                | 397                  | 8.7%             |
|                   |                   | 3 I bought individual sticks (singles)                                                                                                   | 26                   | 0.6%             |
|                   |                   | 4 I bought them in a carton                                                                                                              | 19                   | 0.4%             |
|                   |                   | 5 I bought them in rolls                                                                                                                 | 95                   | 2.1%             |
|                   |                   | 6 I bought tobacco and rolled my own                                                                                                     | 48                   | 1.0%             |

| Original Question | Analysis Variable | Question Code and Label                                                                                                                                               | Unweighted Frequency | Weighted Percent |
|-------------------|-------------------|-----------------------------------------------------------------------------------------------------------------------------------------------------------------------|----------------------|------------------|
| Q43               | GRR43             | On average, how much do you think a pack of 20 cigarettes costs?                                                                                                      |                      |                  |
|                   |                   | . Missing                                                                                                                                                             | 50                   | .                |
|                   |                   | 1 2,00 to 3,00 €                                                                                                                                                      | 463                  | 10.5%            |
|                   |                   | 2 3,00 to 4,00 €                                                                                                                                                      | 2,150                | 47.4%            |
|                   |                   | 3 4,00 to 5,00 €                                                                                                                                                      | 577                  | 12.6%            |
|                   |                   | 4 5,00 to 6,00 €                                                                                                                                                      | 111                  | 2.1%             |
|                   |                   | 5 6,00 to 7,00 €                                                                                                                                                      | 75                   | 1.5%             |
|                   |                   | 6 I don't know                                                                                                                                                        | 1,192                | 25.8%            |
| Q44               | GRR44             | During the past week, how much money did you spend on buying cigarettes or tobacco?                                                                                   |                      |                  |
|                   |                   | . Missing                                                                                                                                                             | 91                   | .                |
|                   |                   | 1 I don't smoke                                                                                                                                                       | 3,316                | 74.8%            |
|                   |                   | 2 I don't buy cigarettes or tobacco                                                                                                                                   | 851                  | 17.4%            |
|                   |                   | 3 Up to 5 €                                                                                                                                                           | 175                  | 3.7%             |
|                   |                   | 4 6 to 10 €                                                                                                                                                           | 97                   | 2.2%             |
|                   |                   | 5 11 to 20 €                                                                                                                                                          | 35                   | 0.8%             |
|                   |                   | 6 21 to 25 €                                                                                                                                                          | 16                   | 0.3%             |
|                   |                   | 7 26 to 30 €                                                                                                                                                          | 10                   | 0.2%             |
|                   |                   | 8 More than 30 €                                                                                                                                                      | 27                   | 0.6%             |
| Q45               | CR30              | During the past month (30 days), did you see or hear any anti-tobacco messages on television, radio, internet, billboards, posters, newspapers, magazines, or movies? |                      |                  |
|                   |                   | . Missing                                                                                                                                                             | 81                   | .                |
|                   |                   | 1 Yes                                                                                                                                                                 | 2,424                | 53.1%            |
|                   |                   | 2 No                                                                                                                                                                  | 2,113                | 46.9%            |
| Q46               | CR31              | During the past month (30 days), did you see or hear any anti-tobacco messages at sports events, fairs, concerts, or community events, or social gatherings?          |                      |                  |
|                   |                   | . Missing                                                                                                                                                             | 61                   | .                |
|                   |                   | 1 I did not go to sports events, fairs, concerts, or community events, or social gatherings in the past 30 days                                                       | 1,129                | 25.1%            |
|                   |                   | 2 Yes                                                                                                                                                                 | 1,049                | 23.3%            |
|                   |                   | 3 No                                                                                                                                                                  | 2,379                | 51.6%            |
| Q47               | CR32              | During the past month (30 days), did you see any health warnings on cigarette packages?                                                                               |                      |                  |
|                   |                   | . Missing                                                                                                                                                             | 117                  | .                |
|                   |                   | 1 Yes, but I didn't think much of them                                                                                                                                | 1,271                | 27.7%            |
|                   |                   | 2 Yes, and they led me to think about quitting smoking or not starting smoking                                                                                        | 1,622                | 36.4%            |
|                   |                   | 3 No                                                                                                                                                                  | 1,608                | 35.9%            |
| Q48               | OR25              | During the past month (30 days), did you see any signs prohibiting the sale of cigarettes and tobacco to minors under 18 years?                                       |                      |                  |
|                   |                   | . Missing                                                                                                                                                             | 100                  | .                |
|                   |                   | 1 Yes                                                                                                                                                                 | 1,290                | 29.0%            |
|                   |                   | 2 No                                                                                                                                                                  | 3,228                | 71.0%            |
| Q49               | CR33              | During the past 12 months, were you taught in any of your classes about the dangers of tobacco use?                                                                   |                      |                  |
|                   |                   | . Missing                                                                                                                                                             | 62                   | .                |
|                   |                   | 1 Yes                                                                                                                                                                 | 2,801                | 60.5%            |
|                   |                   | 2 No                                                                                                                                                                  | 1,361                | 30.5%            |
|                   |                   | 3 I don't know                                                                                                                                                        | 394                  | 9.0%             |
| Q50               | CR34              | During the past 30 days, did you see any people using tobacco when you watched TV, videos, or movies?                                                                 |                      |                  |
|                   |                   | . Missing                                                                                                                                                             | 43                   | .                |
|                   |                   | 1 I did not watch TV, videos, or movies in the past 30 days                                                                                                           | 262                  | 6.4%             |

| Original Question | Analysis Variable | Question Code and Label                                                                                                                                  | Unweighted Frequency | Weighted Percent |
|-------------------|-------------------|----------------------------------------------------------------------------------------------------------------------------------------------------------|----------------------|------------------|
|                   |                   | 2 Yes                                                                                                                                                    | 3,807                | 82.3%            |
|                   |                   | 3 No                                                                                                                                                     | 506                  | 11.3%            |
| Q51               | CR35              | During the past 30 days, did you see any advertisements or promotions for tobacco products at points of sale (such as stores, shops, kiosks, etc.)?      |                      |                  |
|                   |                   | . Missing                                                                                                                                                | 75                   | .                |
|                   |                   | 1 I did not visit any points of sale in the past 30 days                                                                                                 | 1,157                | 25.8%            |
|                   |                   | 2 Yes                                                                                                                                                    | 1,391                | 30.0%            |
|                   |                   | 3 No                                                                                                                                                     | 1,995                | 44.1%            |
| Q52               | GRR52             | Would you ever use or wear something that has a tobacco company or tobacco product name or picture on it such as a lighter, t-shirt, hat, or sunglasses? |                      |                  |
|                   |                   | . Missing                                                                                                                                                | 62                   | .                |
|                   |                   | 1 Yes                                                                                                                                                    | 543                  | 11.9%            |
|                   |                   | 2 No                                                                                                                                                     | 3,220                | 70.7%            |
|                   |                   | 3 Maybe                                                                                                                                                  | 793                  | 17.4%            |
| Q53               | CR37              | Do you have something (for example, t-shirt, pen, backpack) with a tobacco product brand logo on it?                                                     |                      |                  |
|                   |                   | . Missing                                                                                                                                                | 68                   | .                |
|                   |                   | 1 Yes                                                                                                                                                    | 441                  | 9.5%             |
|                   |                   | 2 No                                                                                                                                                     | 4,109                | 90.5%            |
| Q54               | CR38              | Has a person working for a tobacco company ever offered you a free tobacco product?                                                                      |                      |                  |
|                   |                   | . Missing                                                                                                                                                | 68                   | .                |
|                   |                   | 1 Yes                                                                                                                                                    | 265                  | 5.8%             |
|                   |                   | 2 No                                                                                                                                                     | 4,285                | 94.2%            |
| Q55               | CR39              | If one of your best friends offered you a tobacco product, would you use it?                                                                             |                      |                  |
|                   |                   | . Missing                                                                                                                                                | 54                   | .                |
|                   |                   | 1 Definitely not                                                                                                                                         | 3,423                | 75.3%            |
|                   |                   | 2 Probably not                                                                                                                                           | 565                  | 12.5%            |
|                   |                   | 3 Probably yes                                                                                                                                           | 379                  | 8.0%             |
|                   |                   | 4 Definitely yes                                                                                                                                         | 197                  | 4.2%             |
| Q56               | CR40              | At anytime during the next 12 months do you think you will use any form of tobacco?                                                                      |                      |                  |
|                   |                   | . Missing                                                                                                                                                | 48                   | .                |
|                   |                   | 1 Definitely not                                                                                                                                         | 3,471                | 76.3%            |
|                   |                   | 2 Probably not                                                                                                                                           | 450                  | 9.8%             |
|                   |                   | 3 Probably yes                                                                                                                                           | 348                  | 7.5%             |
|                   |                   | 4 Definitely yes                                                                                                                                         | 301                  | 6.4%             |
| Q57               | CR41              | Once someone has started smoking tobacco, do you think it would be difficult for them to quit?                                                           |                      |                  |
|                   |                   | . Missing                                                                                                                                                | 66                   | .                |
|                   |                   | 1 Definitely not                                                                                                                                         | 449                  | 10.2%            |
|                   |                   | 2 Probably not                                                                                                                                           | 378                  | 8.3%             |
|                   |                   | 3 Probably yes                                                                                                                                           | 1,838                | 39.7%            |
|                   |                   | 4 Definitely yes                                                                                                                                         | 1,887                | 41.8%            |
| Q58               | CR42              | Do you think smoking tobacco helps people feel more comfortable or less comfortable at celebrations, parties, or in other social gatherings?             |                      |                  |
|                   |                   | . Missing                                                                                                                                                | 143                  | .                |
|                   |                   | 1 More comfortable                                                                                                                                       | 1,142                | 25.6%            |
|                   |                   | 2 Less comfortable                                                                                                                                       | 1,307                | 29.1%            |
|                   |                   | 3 No difference whether smoking or not                                                                                                                   | 2,026                | 45.3%            |



| Original Question | Analysis Variable | Question Code and Label                                                                         | Unweighted Frequency | Weighted Percent |
|-------------------|-------------------|-------------------------------------------------------------------------------------------------|----------------------|------------------|
| Q59               | CR43              | Do you agree or disagree with the following: "I think I might enjoy smoking a cigarette."       |                      |                  |
|                   |                   | . Missing                                                                                       | 71                   | .                |
|                   |                   | 1 I currently smoke cigarettes                                                                  | 185                  | 4.1%             |
|                   |                   | 2 Strongly agree                                                                                | 108                  | 2.6%             |
|                   |                   | 3 Agree                                                                                         | 295                  | 6.3%             |
|                   |                   | 4 Disagree                                                                                      | 1,154                | 25.0%            |
|                   |                   | 5 Strongly disagree                                                                             | 2,805                | 61.9%            |
| Q60               | GRR60             | In your opinion, are hand-rolled cigarettes less harmful than regular cigarettes?               |                      |                  |
|                   |                   | . Missing                                                                                       | 194                  | .                |
|                   |                   | 1 I totally agree                                                                               | 551                  | 12.9%            |
|                   |                   | 2 I agree                                                                                       | 1,621                | 36.6%            |
|                   |                   | 3 I disagree                                                                                    | 1,409                | 31.6%            |
|                   |                   | 4 I totally disagree                                                                            | 843                  | 19.0%            |
| Q61               | SR1               | Have you ever tried or experimented with shisha, even one or two puffs?                         |                      |                  |
|                   |                   | . Missing                                                                                       | 98                   | .                |
|                   |                   | 1 Yes                                                                                           | 782                  | 16.4%            |
|                   |                   | 2 No                                                                                            | 3,738                | 83.6%            |
| Q62               | GRR62             | The last time you did shisha during the past 30 days, where did you? (select only one response) |                      |                  |
|                   |                   | . Missing                                                                                       | 142                  | .                |
|                   |                   | 1 I did not smoke shisha during the past 30 days                                                | 3,901                | 87.8%            |
|                   |                   | 2 At home                                                                                       | 203                  | 4.6%             |
|                   |                   | 3 At a café                                                                                     | 158                  | 3.0%             |
|                   |                   | 4 At a restaurant or tavern                                                                     | 12                   | 0.3%             |
|                   |                   | 5 At a bar or club or nightclub                                                                 | 60                   | 1.3%             |
|                   |                   | 6 Other                                                                                         | 142                  | 3.1%             |
